# Supplementary material for: Non-invasive brain stimulation for stroke-related motor impairment and disability: an umbrella review of systematic review and meta-analysis
Source: Front Neurosci. 2025 Sep 9;19:1633986. doi: 10.3389/fnins.2025.1633986 (PMC12454317; doi:10.3389/fnins.2025.1633986)
Supplement: Supplementary file 2 [file Table_2.xlsx]

## Sheet: Table S2
Name / Year	OUTCOMES	I² / Heterogeneity p-value	Adverse events	Stimulation target	Stimulation protocol	Number of sessions	Measures	Comparison group
Elsner et al., 2016	Motor function - tDCS	82%; <0.01	Not reported	atDCS (affected M1) or ctDCS (unaffected) or Bi-tDCS	I: 0.5-2mA, D: 13-20min ES: 18-35cm²	15-30	MAS	Sham tDCS or Sham tDCS + virtual reality or physical therapy
Graef et al., 2016	Motor function - TMS	0%; 0.44	No	M1 (unaffected side)	F: 1Hz; T: 1; P:240-1800; MT(%):90	10-22	FMA-UL	Sham rTMS + repetitive facilitation exercises or CIMT or Physical therapy
Graef et al., 2016	Upper limb activity - TMS	52%; 0.02	No	M1 (unaffected or affected side)	F: 1-20Hz; T: 1-50; P:1200-2000; MT(%):90-110	8-22	WMFT	Sham rTMS + task-oriented training or Physical therapy or CMIT or occupational therapy
Triccas et al., 2016	Motor function - tDCS	0%; 0.99	Yes (Headache and dizziness)	atDCS (affected M1), ctDCS (unaffected M1) or bihemispheric M1	I: 1-2mA, D: 13-40min ES: NR	5-30	FMA-UL	Sham tDCS + physical therapy or occupational therapy or CIMT or virtual reality
Triccas et al., 2016	ADL - tDCS	33%; 0.20	Yes (Headache and dizziness)	atDCS (affected M1), ctDCS (unaffected M1) or bihemispheric M1	I: 2mA, D: 20-25min ES: NR	15-30	BI	Sham tDCS + occupational therapy or CIMT or virtual reality
Shen et al., 2017	General neurological function - TMS	53%; 0.05	Yes (Headache, gastrointestinal reaction, tinnitus and feel weak)	lDLPFC or rDLPFC or M1 or bilateral DLPFC	F: 0.5-10Hz; T: 30; P: 1500; MT(%): 60-110	7-24	NIHSS	Regular treatment or sham rTMS + regular treatment or antidepressant
Shen et al., 2017	ADL - TMS	89%; <0.01	Yes (Headache, gastrointestinal reaction, tinnitus and feel weak)	lDLPFC or rDLPFC or M1 or bilateral DLPFC	F: 0.5-10Hz; T:20-30; P:NR; MT(%):60-100	10-60	BI	Sham rTMS + antidepressant or fluoxetine or sertraline or mirtazapine or regular treatment
Zhang et al., 2017a	Motor function - TMS	52%; 0.04	Not reported	M1 (unnafected side)	F: 1Hz; T: NR; P:600-1800; MT(%):80-130	10-24	FMA-UL; Pinch force/; Hand grip	Sham rTMS + physical therapy or occupational therapy or functional task practice or task-oriented training
Zhang et al., 2017a	Upper limb activity - TMS	0%; 0.46	Not reported	M1 (unaffected side)	F: 1Hz; T:NR; P:600-1800; MT(%):90-100	1-24	JTT; NHPT; WMFT	Sham rTMS + rehabilitation or task-oriented training or functional task practice or occupational therapy or extensor activity
Zhang et al., 2017b	Motor function - TMS	0%;0.02	Yes (Headache, anxiety, nausea, tingling and dizziness)	M1 (unaffected or affected side)	F: 1-50Hz; T:20-50; P: 160-2000; MT(%):80-130	1-24	FMA-UL; Pinch force; Hand grip; Complex hand movement	Sham rTMS isolated or sham rTMS + regular treatment
Li et al, 2018 a	Motor function - TMS	0%; 0.72	Not reported	M1 (unaffected or affected side) of the leg area	F: 1-20Hz; T:1-30; P:600-2000; MT(%):90	1-40	FMA-LL	Sham rTMS or sham rTMS + task-oriented training
Li et al, 2018 a	Mobility - TMS	0%; 0.53	Not reported	M1 (unaffected or affected side) of the leg area	F: 1-20Hz; T: 1-30; P:600-2000; MT(%):90	1-40	TUG; 10MWT; Gait analysis	Sham or sham + MI + rehab or sham + rehab
Li et al., 2018 b	Mobility - tDCS	0%; 0.71	No	atDCS(affected M1), ctDCS (unaffected M1)	I: 1.5-2mA D: 7-20min ES: 35cm2	10 weeks	TUG; 6MWT; 10MWT	Sham tDCS + rehabilitation
Li et al., 2018 b	Motor function - tDCS	82%; <0.01	No	atDCS(affected M1), ctDCS (unaffected M1)	I: 2mA D: 10-25min ES: 7.07-35cm2	6-10 weeks	Lower limb motricity index; MRC	Sham tDCS + physical therapy or rehabilitation
McIntyre et al., 2018	Motor function - TMS	42%; NR	No	M1 (unaffected)	F: 1Hz; T: 1; P:240-1500; MT(%):90	10 weeks	MAS	Sham rTMS + physical therapy or occupational therapy
O'Brien et al., 2018	Upper limb activity - TMS	67%;<0.01	Not reported	M1 or PMd (unaffected or affected side)	F: 1-20Hz; T:NR; P:600-2000; MT(%):90-110	1-10 weeks	BBT; JTT; NHPT; PPT	Sham rTMS or sham rTMS + motor training or CIMT or Brunnstrom hand manipulation
O'Brien et al., 2018	Upper limb activity - tDCS	34%; 0.11	Not reported	M1 or PMd (unaffected or affected side)	I: 1-1.5mA D: 10-40 min ES: 25-35cm2	1-10 weeks	ARAT	Sham tDCS or Sham tDCS + occupational theerapy or robot assisted training
Ghayour-Najafabadi et al., 2019	Motor function - TMS	77%; <0.01	No	M1 (unaffected or affected side) of the leg area or Cerebellum	F: 1-10Hz; T: NR; P:900-2000; MT(%):90-130	5-140	FMA-LL	Without stimulation or Sham rTMS or Sham rTMS + physical therapy or mirror therapy or rehabitilitation
Ghayour-Najafabadi et al., 2019	Mobility - TMS	0%; 0.62	No	M1 (unaffected or affected side) of the leg area or Cerebellum	F: 1-10Hz; T: NR; P:900-2000; MT(%):90-130	5-140	BBS; TUG	Without stimulation or Sham rTMS or Sham rTMS + physical therapy or mirror therapy or rehabitilitation
Liu et al., 2019	General neurological function - TMS	0%; 0.94	Yes (Headache and anxiety)	LDLPFC	F: 10Hz; T: NR; P: NR; MT(%):80-110	10-20	NIHSS	Fluoxetine or Citalopram or Sertraline/Deanxit or Sham stimulation
Liu et al., 2019	ADL - TMS	89%; <0.01	Yes (Headache and anxiety)	LDLPFC	F:10Hz; T:NR; P:NR; MT(%):60-90	10-60	BI	General treatment or general treatment + citalopram/fluoxetine
Tung et al., 2019	Motor function - TMS	0%; 0.56	Yes (dizziness and tingling)	M1 (unaffected or affected side) of the leg area or Cerebellum or LDLPFC	F: 1-20Hz; T: NR; P:600-1500; MT(%):90-130	10-15	FMA-LL; brunnstrom recovery stage for lower limb; plantarflexion peak torque; lower limb motricity index	Sham rTMS or sham rTMS + Task-oriented training or treadmill training or ankle strengthening exercise or movement therapy or physical therapy
Tung et al., 2019	Mobility - TMS	35%; 0.18	Yes (dizziness and tingling)	M1 (unaffected or affected side) of the leg area or Cerebellum or LDLPFC	F: 1-10Hz; T:NR; P:600-1000; MT(%):90-110	5-40	BBS; FAC; Walking speed; ABMS II	Sham rTMS or sham rTMS + Task-oriented training or treadmill training or ankle strengthening exercise or movement therapy or physical therapy
Van Lieshout et al., 2019	Motor function - TMS	66%; <0.01	NR	M1 or PMd (unaffected or affected side)	F: 1-5Hz; T: NR; P:240-1800; MT(%):80-120	5-24	FMA-UL	Sham rTMS + conventional therapy or virtual reality or physical therapy or functional task practice
Van Lieshout et al., 2019	Upper limb activity - TMS	49%; <0.01	NR	M1 or PMd (unaffected or affected side)	F: 1-5Hz; T:NR; P:240-1800; MT(%):80-120	5-24	ARAT; JTT; BBT; NHPT; PPT	Sham rTMS + conventional therapy or virtual reality or physical therapy or functional task practice
Vaz et al., 2019	Mobility - TMS	0%; 0.72	NR	M1 (unaffected or affected side) of the leg area	F: 1-10Hz; T:NR; P:600-2000; MT(%):90-100	10-30	10m-WT; 3-D gait analysis; 6MWT; FAC; Motricity Index	sham rTMS or sham rTMS + physical therapy or task oriented training
Vaz et al., 2019	Mobility - tDCS	25%;0.16	NR	M1 (unaffected or affected side) of the leg area	I:1-2.5 mA D: 7-20 min ES: NR	2025-12-07	10m-WT; 3-D gait analysis; 6MWT; FAC	sham tDCS + gait training or physical therapy
Xiang et al., 2019	Motor function - TMS	0%; 0.68	Yes (headaches, fatigue, drowsiness, neck pain, anxiety, cast irritation, and neurocardiogenic syncope)	M1 (unaffected or affected side)	F: 1-25Hz; T: NR; P:150-1800; MT(%):80-130	1-24	BRS; JTT; NHPT; PPT; WMFT; FMA-LL	Sham rTMS
Xiang et al., 2019	ADL - TMS	0%; 0.78	Yes (headaches, fatigue, drowsiness, neck pain, anxiety, cast irritation, and neurocardiogenic syncope)	M1 (unaffected or affected side)	F: 1-25Hz; T: NR; P:150-1800; MT(%):80-130	1-24	BI; Activity Index	Sham rTMS
Allida et al., 2020	ADL - TMS	99%; <0.01	No	LDLPFC or M1 (unaffected side)	F:1-10Hz; T:NR; P:1960; MT(%):80%	10-28	BI	Sham rTMS + usual care
Allida et al., 2020	General neurological function - TMS	93%; <0.01	No	LDLPFC or RDLPFC or M1 (unaffected side)	F: 1-10Hz; T:20-50; P:800-2500; MT(%):80-90	20-28	NIHSS	Sham or usual care
Elsner et al., 2020	Upper limb activity - tDCS	0%; 0.84	No	M1 (affected or unaffected side)	I: 0,5-2mA D: 7-40min ES: NR	10-30	ARAT	Sham tDCS + physical therapy or occupational therapy or mirror therapy or virtual reality
Elsner et al., 2020	Mobility - tDCS	31%; 0.14	No	M1 (affected or unaffected side)	I: 0,5-2mA D: 7-40min ES: NR	10-30	FAC; Walking velocity; Walking capacity	Sham tDCS + physical therapy or occupational therapy or mirror therapy or virtual reality
Elsner et al., 2020	Motor function - tDCS	42%; 0.01	No	M1 (affected or unaffected side)	I: 0,5-2mA D: 7-40min ES: NR	10-30	MAL; FMA-UL	Sham tDCS + physical therapy or occupational therapy or mirror therapy or virtual reality
Elsner et al., 2020	ADL - tDCS	0%; 0.87	No	M1 (affected or unaffected side)	I: 0,5-2mA D: 7-40min ES: NR	10-30	Barthel Index; FIM	Sham tDCS + physical therapy or occupational therapy or mirror therapy or virtual reality
Kang et al., 2020	Mobility - TMS	37%; NR	NR	M1 (unaffected or affected side) of the leg area or Cerebellum	F: 1-10Hz; T:NR; P:900-1000; MT(%):90-130	5-20	BBS; Tinetti Test; Trunk Control	Sham rTMS + physical therapy or mirror therapy or rehabilitation
Kang et al., 2020	Mobility - tDCS	59%; NR	NR	M1 (unaffected or affected side)	I: 1-2mA D: 10-20 min ES: 7.07-35 cm²	1-16	FMA/BBS	Sham tDCS + robotic training or physical therapy or rehabilitation or occupational therapy
Tien et al., 2020	Mobility - tDCS	0%; 0.57	No	Noncephalic areas; premotor cortex; M1 (unaffected or affected side)	I: 1-2 mA, D: 7-20 min ES: 10-35 cm²	1-20	RAG; TRT BBS	Sham tDCS
Comino-Suárez et al., 2021	Motor function - tDCS	0%; 0.61	Yes (headache, fatigue, and tingling)	atDCS (affected M1), ctDCS (unaffected M1)	I:1-2mA D: 7-30min ES:25-35cm²	2-36	FMA	Sham tDCS + robot assisted training or Lokomat or upper limb robotic assisted training
Comino-Suárez et al., 2021	Upper limb activity - tDCS	0%; 0.80	Yes (headache, fatigue, and tingling)	atDCS (affected M1), ctDCS (unaffected M1)	I:1-2mA D: 7-30min ES:25-35cm²	2-36	FMA	Sham tDCS + robot assisted training or Lokomat or upper limb robotic assisted training
Comino-Suárez et al., 2021	ADL - tDCS	0%; 0.66	Yes (headache, fatigue, and tingling)	atDCS (affected M1), ctDCS (unaffected M1)	I:1-2mA D: 7-30min ES:25-35cm²	2-36	FMA	Sham tDCS + robot assisted training or Lokomat or upper limb robotic assisted training
Reis et al., 2021	Upper limb activity - tDCS	0%; 0.45	NR	NR	I: NR D: 20-30min ES: NR	1-36	ARAT; BBT; WMFT	Sham + robotic assisted training
Shao et al., 2021	General neurological function - TMS	33%; 0.23	No	NR	NR	7-20	modified Scandinavian Stroke Scale; modified Brunnstrom Classification; NIHSS	Routine treatment or Fluoxetine or Sham rTMS or Sham rTMS + deanxit
Sun et al., 2021	Motor function - tDCS	NR; NR	NR	Bihemispheric tDCS (affected and unaffected M1), atDCS (affected M1), ctDCS (affected M1)	I: 1-2 mA D: 13-40 min ES:35 cm²	6-20	FMA-UL	Sham tDCS + rehabilitation or virtual reality or phisical therapy or occupational therapy
Van Hoornweder et al., 2021	Motor function - tDCS	68%; 0.01	NR	atDCS (affected M1, PMd & SMA), ctDCS (unaffected M1), bihemispheric tDCS (affected M1+unaffected M1)	I:1-2mA D: 9-30min ES:16-35cm²	5-30	FMA-UL	Sham tDCS + CIMT or robot assisted training or virtual reality or occupational therapy
Huang et al., 2022	Motor function - tDCS	87%; <0.01	No	atDCS (affected M1), ctDCS (unaffected M1/S1)	I: 0,5-2 mA D: 13-30 min ES:16-35 cm²	10-40	MAS	Sham tDCS + physical therapy or virtual reality or CIMT or robot-assisted trainimg or Electroacupuncture or Exercise training
Krogh et al., 2022	Mobility - TMS	0%; 0.62	NR	M1 (unaffected or affected side)	F: 1-10Hz; T:15-50; P:900-2000; AMT(%):90-130	5-20	TUG, PASS, 10MWT, BBS, Gait velocity during non-standard gait analysis	Sham rTMS or Sham rTMS + motor imagery or physical training or treadmill training
Krogh et al., 2022	Motor function - TMS	9%; 0.24	NR	M1 (unaffected or affected side)	F: 1-10Hz; T:15-50; P:900-2000; AMT(%):90-130	5-20	FMA-LL	Sham rTMS or Sham rTMS + motor imagery or physical training or treadmill training
Ahmed et al., 2023	Motor function - TMS	37%; 0.14	NR	M1 (unaffected or affected side)	F: 1-10Hz; T: NR; P: NR; MT(%): NR	10-24	FMA	Sham rTMS + Physical therapy or Occupational therapy or rehabilitation
Ahmed et al., 2023	ADL - TMS	84%; 0.01	NR	M1 (unaffected or affected side)	F: 1-10Hz; T:NR; P:NR; MT(%):NR	10-24	BI, FIM, MAL	Sham rTMS + Physical therapy or Occupational therapy or rehabilitation
Ahmed et al., 2023	Motor function - tDCS	81%; <0.01	NR	atDCS (affected M1), ctDCS (unaffected M1)	I:1-20mA D: 10-30min ES: NR	9-36	FMA-UL	Sham tDCS + robot assisted training or virtual reality or occupational therapy or physical therapy or CIMT
Ahmed et al., 2023	ADL - tDCS	73%; 0.02	NR	atDCS (affected M1), ctDCS (unaffected M1)	I:1-20mA D: 10-30min ES: NR	9-36	BI, FIM, MAL	Sham tDCS + robot assisted training or virtual reality or occupational therapy or physical therapy or CIMT
Chen et al., 2023 a	Motor function - TMS	81%; <0.01	Yes (Headache and dizziness)	M1 (unaffected or affected side) of the leg area	F: 1-10Hz; T: NR; P: NR; MT(%):80-100	10-20	FMA-LL	Rehabilitation therapy + medical treatment or Physical therapy + medical treatment or sham rTMS + Rehabilitation therapy + medical treatment
Chen et al., 2023 a	General neurological function - TMS	68%; <0.01	Yes (Headache and dizziness)	M1 (unaffected or affected side) of the leg area	F: 1-10Hz; T: NR; P: NR; MT(%):80-100	10-20	NIHSS	Rehabilitation therapy + medical treatment or Physical therapy + medical treatment or sham rTMS + Rehabilitation therapy + medical treatment
Chen et al., 2023 a	ADL - TMS	97%; <0.01	Yes (Headache and dizziness)	M1 (unaffected or affected side) of the leg area	F: 1-10Hz; T:NR; P:NR; MT(%):80-100	10-20	BI	Rehabilitation therapy + medical treatment or Physical therapy + medical treatment or sham rTMS + Rehabilitation therapy + medical treatment
Chen et al., 2023 b	ADL - TMS	84%; <0.01	Yes (headaches, dizziness, palpitation, anxiety, gastrointestinal symptoms)	DLPFC (Left or affected side)	F: 3-10 Hz; T: NR; P: NR; MT(%): 80-120	20-48	MBI; BI	Sham rTMS + cognitive training or routine medication treatment or rehabilitation or hyperbaric oxigen therapy or accupunture or occupational therapy
Gao et al., 2023	ADL - TMS	0%; NR	Yes (Headache and dizziness)	DLPFC (Left side)	F: 1-10Hz; T: NR; P: 900-2000; MT(%): 80-100	10-20	MBI	NR
Hofmeijer et al., 2023	Mobility - TMS	69%; 0.02	NR	M1 (affected or unaffected side)	F: 1-10Hz; T: NR; P: 1000-1200; MT(%): 90	5-21	FAC; BBS	Sham rTMS + rehabitilation or physical therapy or virtual reality
Hofmeijer et al., 2023	Motor function - TMS	83%; <0.01	NR	M1 (affected or unaffected side)	F: 1-10Hz; T: NR; P: 100-1800; MT(%): 80-90	10-24	FMA-UL	Sham rTMS + rehabitilation or physical therapy or virtual reality
Hofmeijer et al., 2023	ADL - TMS	80%<0.01	NR	M1 (affected or unaffected side)	F: 1-20Hz; T: NR; P: 900-1200; MT(%): 80-130	5-24	BI; FIM	Sham rTMS + rehabitilation or physical therapy or virtual reality
Lima et al., 2023	Motor function - tDCS	76%; <0.01	NR	M1 (affected or unaffected side)	I: NR D: NR ES: NR	NR	FMA-LL	Sham tDCS + PT or OT
Lima et al., 2023	Mobility - tDCS	0%; 0.79	NR	M1 (affected or unaffected side)	I: NR D: NR ES: NR	NR	TUG; BBS	Sham tDCS + PT or robot assisted training
Xi et al., 2023	Upper limb activity - TMS	0%; NR	NR	M1 (affected or unaffected side)	F: 1-20Hz; T: NR; P: 1200-1500; MT(%): 90-110	8-20	BBT	Sham rTMS + task-oriented training
Xi et al., 2023	Motor function - TMS	0%; NR	NR	M1 (affected or unaffected side); left posterior parietal cortex	F: 1-10Hz; T: NR; P: 200-2000; MT(%): 80-90	24-48	FMA-UL	Sham rTMS + task-oriented training or Physical therapy or rehabilitation
Xi et al., 2023	ADL - TMS	39.9%; NR	NR	M1 (affected or unaffected side); left posterior parietal cortex	F: 1-10Hz; T: NR; P: 600-2000; MT(%): 80-90	24-42	BI	Sham rTMS + task-oriented training
Xie et al., 2023	ADL - TMS	36%; 0.21	No	DLPFC (Left, bilateral or unaffected side)	F: 1-10Hz; T: NR; P: NR MT(%): 80-120	20	MBI	Sham rTMS or no intervention
Zhou et al., 2023	Mobility - TMS	0%; 0.99	No	M1 (affected and unaffected side); supplementary motor area; DLPFC; cerebellum	F: 0.5-50Hz; T: NR; P: 450-3000; MT(%): 80-130	1-15	BBS; TUG; Walking performance	Sham rTMS
Chen et al., 2024	Motor function - TMS	79%; <0.01	No	M1 (affected and unaffected side); cerebellum	F: 5 Hz; T: 20-40; P: 600-1200; MT(%): 70-100	10-30	FMA-LL	Sham rTMS + rehabilitation or suspension exercise
	Mobility - TMS	78%; 0.01	No	M1 (affected and unaffected side); cerebellum	F: 5 Hz; T: 20-40; P: 600-1200; MT(%): 70-100	10-30	BBS; TUG; 10mWT	Sham rTMS + rehabilitation or suspension exercise
	ADL - TMS	0%; 0.80	No	M1 (affected and unaffected side); cerebellum	F: 5 Hz; T: 20-40; P: 600-1200; MT(%): 80-100	10-20	MBI	Sham rTMS + rehabilitation or suspension exercise
Daoud et al., 2024	ADL - TMS	0%; 0.48	No	DLPFC (left)	F: 5 Hz; T: 20-40; P: 600-1200; MT(%): 56-80	20-30	BI; MBI	Sham rTMS or sham rTMS + cognitive training
Jiang et al., 2024	Motor function - TMS	65%; <0.01	No	M1 (affected and/or unaffected side); cerebellum (ipsilesional)	F: 5Hz; T: 1-40; P: 600-1200; MT(%): 60-110	9-30	FMA-UL; FMA-LL; MAS	Sham TBS + PT or rehabilitation or virtual reality or RAT
	Upper limb activity - TMS	94%; <0.01	No	M1 (affected or unaffected side)	F: 5Hz; T: 1-20; P: 600; MT(%): 80-90	10	NHPT; ARAT	Sham TBS + PT or rehabilitation
	Mobility - TMS	59%; 0.08	No	M1 (affected and unaffected side); cerebellum (ipsilesional)	F: 5Hz; T: 20-40; P: 600-1200; MT(%): 80-100	10-30	BBS	Sham TBS + PT or rehabilitation
Lima et al., 2024	Motor function - tDCS	0%; 1.00	No	M1 (affected and unaffected side)	I:1-2 mA D: 10-30 min ES: NR	NR	FMA-UL	Sham tDCS + Robot assisted training
Ren et al., 2024	Motor function - TMS	86%; <0.01	No	M1 (affected and unaffected side)	F: 1-10 Hz; T: NR; P: 900-1000; MT(%): 80-120	15-30	FMA-UL	Sham rTMS
	Motor function - tDCS	0%; 0.75	No	M1 (affected and unaffected side)	I:NR D: 20-30 min ES: NR	5-20	FMA-UL	Sham tDCS
Tang et al., 2024	Motor function - tDCS	49%; <0.01	No	M1 (affected and unaffected side); supplementary motor area; DLPFC; cerebellum	I:1-2 mA D: 9-40 min ES: 16-35 cm²	5-60	FMA-UL; ARAT	NR
	ADL - tDCS	37%; 0.07	No	M1 (affected and unaffected side)	I:1.5-2 mA D: 10-30 min ES: 22-35 cm²	10-60	BI	NR
Wang et al., 2024 a	Mobility - TMS	69%; <0.01	Yes (Vertigo)	Cerebellum (contra or ipsilesional)	F: 1-10Hz; T: NR; P: 600-1200; MT(%): 80-100	10-21	BBS, TUG	Sham + PT or rehabilitation or mirror therapy
	ADL - TMS	80%; <0.01	No	Cerebellum (contra or ipsilesional)	F: 5-10Hz; T: 20-40; P: 600-1200; MT(%): 80-110	10-24	BI, MBI	Rehabilitation or sham rTMS + rehabilitation or sham + PT or sham +rehabilitation + accupunture
Wang et al., 2024 b	Motor function - TMS	0%; NR	NR	M1 (affected and unaffected side)	F: 1-10Hz; T: 1-NR; P: 1000-1200; MT(%): 80-90	15-40	FMA-UL	Rehabilitation or sham rTMS + rehabilitation
	ADL - TMS	0%; NR	NR	M1 (affected and unaffected side)	F: 1-10Hz; T: 1-NR; P: 1000-1200; MT(%): 80-90	15-40	BI, MBI	Rehabilitation or sham rTMS + rehabilitation
Zeng et al., 2024	Motor function - TMS	0%; 0.42	NR	Cerebellum (contralesional)	F: 1-10Hz; T: 1-NR; P: 600-1600; MT(%): 80-110	10-20	FMA-LL	Sham + PT or rehabilitation
	Mobility - TMS	76%; <0.01	NR	Cerebellum (contra or ipsilesional)	F: 1-10Hz; T: 1-NR; P: 600-1000; MT(%): 80-110	5-21	BBS	Sham + PT or rehabilitation
Zhang et al., 2024a	ADL - tDCS	0%; 0.356	NR	M1 (unaffected side)	I: 2 mA D: 20-30 min ES: NR	10-15	MBI	Sham tDCS + VR or rehabilitation
Zhang et al., 2024b	Motor function -TMS	76.2%; <0.01	NR	M1 (affected or unaffected side)	F: 5Hz; T: 20-40; P: 600-1200; MT(%): 60-110	9-30	FMA-UL	Sham + rehabilitation or PT or RAT or VR
	Upper limb activity - TMS	34.2%; 0.07	NR	M1 (affected or unaffected side)	F: 5Hz; T: 20-40; P: 600-1200; MT(%): 60-110	9-30	ARAT; WMFT; JTT	Sham + rehabilitation or PT or RAT or VR
Zhu et al., 2024	ADL - TMS	52.6%; 0.12	No	DLPFC (left or unaffected side)	F: 1-10Hz; T: 1-20; P: 600-1000; MT(%): NR	5-30	MBI	NR
Barreto et al., 2025	Motor function - TMS	81%; <0.01	NR	M1 (affected or unaffected side); left posterior parietal cortex	F: 1-20Hz; T: NR; P: 200-2000; MT(%): 60-120	5-24	FMA-UL; WMFT; ARAT	Sham rTMS + physical therapy or occupational therapy or virtual reality or electrotherapy or Brunnstrom hand manipulation or CIMT or task oriented training
Jia et al., 2025	Motor function - TMS	35%; 0.07	NR	M1 (affected and/or unaffected side); left DLPFC	F: 1-20Hz; T: NR; P: 600-1600; MT(%): 80-130	5-21	FMA-LL	NR
	Mobility - TMS	20%; 0.28	NR	M1 (affected and/or unaffected side); left DLPFC	F: 1-20Hz; T: NR; P: 600-1600; MT(%): 80-100	2025-11-05	10mWT; BBS	NR
Ma et al., 2025	Motor function - TMS	87%; <0.01	NR	M1 (affected and/or unaffected side); affected DLPFC	F: 1-10Hz; T: NR; P: NR; MT(%): 80-100	10-20	NR	Sham rTMS or rehabilitation or accupunture or ganglion block or cold water bath therapy
Usman et al., 2025	Mobility - tDCS	0%; 0.89	No	M1 (affected and/or unaffected side)	I:1-2 mA D: 15-20 min ES: 1.75-25 cm²	2025-12-04	Gait speed	Sham tDCS or sham tDCS + HIIT
Wang et al., 2025	Mobility - TMS	20%; 0.25	No	Cerebellum (contra or ipsilesional)	F: 1-5Hz; T: 1-40; P: 600-1200; MT(%): 80-100	5-15	BBS; TUG; 10mWT	Sham + PT
	Motor function - TMS	67%; 0.05	No	Cerebellum (contralesional)	F: 5Hz; T: 20-40; P: 600-1200; MT(%): 80	10	FMA-LL	Sham + PT
	ADL - TMS	0%; 0.67	No	Cerebellum (contralesional)	F: 5Hz; T: 20-40; P: 600-1200; MT(%): 80	10-20	BI, MBI	Sham + PT or rehabilitation
Xie et al., 2025	Motor function - TMS	35%; 0.02	Yes (seizure, headache, drowsiness)	M1 (affected and/or unaffected side); left DLPFC; premotor cortex (contralateral); cerebellum (ipsilateral)	F: 0.1-20Hz; T: NR; P: 200-7500; MT(%): 80-130	5-40	FMA-UL; FMA-LL	Sham + rehabilitation or PT or OT or rehabilitation
	General neurological function - TMS	81%; <0.01	Yes (seizure, headache, drowsiness)	M1 (affected and/or unaffected side)	F: 1-10Hz; T: NR; P: 900-1800; MT(%): 80-120	5-20	NIHSS	Sham + rehabilitation or PT
	ADL - TMS	83%; <0.01	Yes (seizure, headache, drowsiness)	M1 (affected and/or unaffected side)	F: 0.5-10Hz; T: NR; P: 200-1200; MT(%): 80-130	5-40	MBI	Sham + rehabilitation or PT or OT or rehabilitation
Yu et al., 2025	Motor function - tDCS	86%; <0.01	Yes (headache, tingling, burning, itching)	M1 (affected side)	I: 1-2 mA D: 20-45 min ES: 25-50 cm²	5-36	FMA-UL	Sham tDCS + rehabilitation or accupunture or PT or RT
	Upper limb activity - tDCS	17%; 0.30	No	M1 (affected side)	I: 1-2 mA D: 20-45 min ES: 25-50 cm²	12-24	WMFT	Sham tDCS + rehabilitation or accupunture or PT
	ADL - tDCS	88%; <0.01	Yes (headache, tingling, burning, itching)	M1 (affected side)	I: 1-2 mA D: 20-45 min ES: 25-50 cm²	5-36	BI	Sham tDCS + rehabilitation or accupunture or PT or RT
Zhang et al., 2025	Motor function -TMS	86%; <0.01	NR	M1 (affected and unaffected side); cerebellum (ipsilesional); premotor cortex (unaffected side); S1 (affected side)	F: 1-20Hz; T: NR; P: 500-2000; MT(%): 20-120	5-20	FMA-UL	Sham + PT or OT
10MWT, 10-metre walking test; 6MWT, 6-minute Walk Test; 9HPT, 9-Hole Peg Test; AT, The albert test; ABMS-II, Ability for Basic Movement Scale II; ARAT, Action Research Arm Test; AS, Ashworth spasticity; b-tDCS, bilateral-tDCS; BDLPFC, bilateral dorsolateral prefrontal cortex; Bi, bilateral (anodal + cathodal); B&B, Box & block teST; BBS, Berg Balance Scale; BBT, Box and Block Test; BI, Barthel In…

## Sheet: Included protocols
	Name / Year	DOI	AMSTAR	AMSTAR Classification	TMS / tDCS	OUTCOMES	GRADE presente / ausente	GRADE n	GRADE Study design	GRADE Risk of bias	GRADE Inconsistency	GRADE Indirectness	GRADE Imprecision	GRADE - Other considerations	GRADE - n. Participants NIBS	GRADE - n. Participants Sham	N Total	GRADE - Effect size	SMD	CI (lower)	CI (higher)	NNT	NNT (lower)	NNT (higher)	I² / Heterogeneity p-value	GRADE - Certainty	Adverse events	rTMS / tDCS protocols	Figure	Stimulation target	Stimulation protocol	Number of sessions	Measures	ICF subdomains	Comparison group
1	Elsner et al., 2016	doi: 10.2340/16501977-2097	14	High	tDCS	Motor function - tDCS	Presente	5	RCT	Non serious	Very serious	Non serious	Very serious	None	183	132	315	SMD: -0.36 (-0.94 to 0.21)	-0.36	-0.94	0.21	10	5	-17	82%; <0.01	Very low	Not reported	Mixed protocols	OK	atDCS (affected M1) or ctDCS (unaffected) or Bi-tDCS	I: 0.5-2mA, D: 13-20min ES: 18-35cm²	15-30	MAS	b735 Muscle tone functions	Sham tDCS or Sham tDCS + virtual reality or physical therapy
2	Graef et al., 2016	http://dx.doi.org/10.1016/j.jns.2016.08.016	12	Moderate	TMS	Motor function - TMS	Presente	4	RCT	Serious	Serious	Non serious	Very serious	None	83	61	144	SMD: -0.04 (-0.38 to 0.3)	-0.04	-0.38	0.3	89	10	-12	0%; 0.44	Very low	No	Low frequency rTMS	OK	M1 (unaffected side)	F: 1Hz; T: 1; P:240-1800; MT(%):90	10-22	FMA-UL	b730 Muscle power functions b760 Control of voluntary movement functions	Sham rTMS + repetitive facilitation exercises or CIMT or Physical therapy
	Graef et al., 2016					Upper limb activity - TMS	Presente	12	RCT	Serious	Very serious	Non serious	Very serious	None	185	141	326	SMD: -0.06 (-0.41 to 0.29)	-0.06	-0.41	0.29	60	9	-13	52%; 0.02	Very low	No	Mixed protocols of rTMS	OK	M1 (unaffected or affected side)	F: 1-20Hz; T: 1-50; P:1200-2000; MT(%):90-110	8-22	WMFT	d445 Hand and arm use d430 Lifting and carrying objects d440 Fine hand use	Sham rTMS + task-oriented training or Physical therapy or CMIT or occupational therapy
3	Triccas et al., 2016	http://dx.doi.org/10.1016/j.clinph.2015.04.067	13	Moderate	tDCS	Motor function - tDCS	Presente	7	RCT	Serious	Very serious	Non serious	Very serious	None	129	90	219	SMD: -0.11 (-0.38 to 0.17)	-0.11	-0.38	0.17	33	10	-21	0%; 0.99	Very low	Yes (Headache and dizziness)	Mixed protocols or tDCS	OK	atDCS (affected M1), ctDCS (unaffected M1) or bihemispheric M1	I: 1-2mA, D: 13-40min ES: NR	5-30	FMA-UL	b730 Muscle power functions b760 Control of voluntary movement functions	Sham tDCS + physical therapy or occupational therapy or CIMT or virtual reality
	Triccas et al., 2016					ADL - tDCS	Presente	5	RCT	Serious	Very serious	Non serious	Very serious	None	129	71	200	SMD: -0.19 (-0.50 to 0.12)	-0.19	-0.5	0.12	19	8	-30	33%; 0.20	Very low	Yes (Headache and dizziness)	Mixed protocols or tDCS	OK	atDCS (affected M1), ctDCS (unaffected M1) or bihemispheric M1	I: 2mA, D: 20-25min ES: NR	15-30	BI	d450 Walking d410 Changing basic body position d530 Toileting d540 Dressing d550 Eating d510 Washing oneself d420 Transferring oneself	Sham tDCS + occupational therapy or CIMT or virtual reality
4	Shen et al., 2017	http://dx.doi.org/10.1016/j.jad.2016.12.058	14	High	TMS	General neurological function - TMS	Presente	7	RCT	Non serious	Serious	Serious	Serious	None	164	165	329	SMD: -0.94 (-1.29 to -0.60)	-0.94	-1.29	-0.6	5	4	7	53%; 0.05	Very low	Yes (Headache, gastrointestinal reaction, tinnitus and feel weak)	Mixed protocols of rTMS	OK	lDLPFC or rDLPFC or M1 or bilateral DLPFC	F: 0.5-10Hz; T: 30; P: 1500; MT(%): 60-110	7-24	NIHSS	b110 Consciousness functions b130 Energy and drive functions b140 Attention functions b310 Voice functions b320 Articulation functions b710 Mobility of joint functions b730 Muscle power functions	Regular treatment or sham rTMS + regular treatment or antidepressant
	Shen et al., 2017					ADL - TMS	Presente	7	RCT	Non serious	Serious	Serious	Non serious	None	331	329	660	SMD: -1.20 (-1.72 to -0.68)	-1.2	-1.72	-0.68	4	3	6	89%; <0.01	Low	Yes (Headache, gastrointestinal reaction, tinnitus and feel weak)	Mixed protocols of rTMS	OK	lDLPFC or rDLPFC or M1 or bilateral DLPFC	F: 0.5-10Hz; T:20-30; P:NR; MT(%):60-100	10-60	BI	d450 Walking d410 Changing basic body position d530 Toileting d540 Dressing d550 Eating d510 Washing oneself d420 Transferring oneself	Sham rTMS + antidepressant or fluoxetine or sertraline or mirtazapine or regular treatment
5	Zhang et al., 2017a	https://doi.org/10.1155/2017/2758097	12	Moderate	TMS	Motor function - TMS	Presente	8	RCT	Serious	Serious	Non serious	Serious	None	150	151	301	SMD: -0.29 (-0.64 to 0.06)	-0.29	-0.64	0.06	13	6	-60	52%; 0.04	Very low	Not reported	Low frequency rTMS	OK	M1 (unnafected side)	F: 1Hz; T: NR; P:600-1800; MT(%):80-130	10-24	FMA-UL; Pinch force/; Hand grip	b730 Muscle power functions b760 Control of voluntary movement functions	Sham rTMS + physical therapy or occupational therapy or functional task practice or task-oriented training
	Zhang et al., 2017a					Upper limb activity - TMS	Presente	9	RCT	Serious	Serious	Non serious	Very serious	None	118	114	232	SMD: -0.32 (-0.55 to -0.09)	-0.32	-0.55	-0.09	12	7	40	0%; 0.46	Very low	Not reported	Low frequency rTMS	OK	M1 (unaffected side)	F: 1Hz; T:NR; P:600-1800; MT(%):90-100	1-24	JTT; NHPT; WMFT	d445 Hand and arm use d430 Lifting and carrying objects d440 Fine hand use	Sham rTMS + rehabilitation or task-oriented training or functional task practice or occupational therapy or extensor activity
6	Zhang et al., 2017b	DOI: 10.1177/0269215517692386	12	Low	TMS	Motor function - TMS	Presente	27	RCT	Very serious	Very serious	Non serious	Serious	None	470	199	669	SMD: -0.49 (-0.68 to -0.29)	-0.49	-0.68	-0.29	8	6	13	0%;0.02	Very low	Yes (Headache, anxiety, nausea, tingling and dizziness)	Mixed protocols of rTMS	Ok	M1 (unaffected or affected side)	F: 1-50Hz; T:20-50; P: 160-2000; MT(%):80-130	1-24	FMA-UL; Pinch force; Hand grip; Complex hand movement	b730 Muscle power functions b760 Control of voluntary movement functions	Sham rTMS isolated or sham rTMS + regular treatment
7	Li et al, 2018 a	DOI: 10.1097/PHM.0000000000000948	13	Moderate	TMS	Motor function - TMS	Presente	3	RCT	Serious	Non serious	Non serious	Very serious	None	38	38	76	SMD: -0.43 (-0.56 to 0.30)	-0.43	-0.56	0.3	9	7	-12	0%; 0.72	Very low	Not reported	Mixed protocols of rTMS	OK	M1 (unaffected or affected side) of the leg area	F: 1-20Hz; T:1-30; P:600-2000; MT(%):90	1-40	FMA-LL	b730 Muscle power functions b760 Control of voluntary movement functions	Sham rTMS or sham rTMS + task-oriented training
	Li et al, 2018 a					Mobility - TMS	Presente	9	RCT	Serious	Very serious	Non serious	Very serious	None	146	144	290	SMD: -0.40 (-0.63 to -0.16)	-0.4	-0.63	-0.16	9	6	23	0%; 0.53	Very low	Not reported	Mixed protocols of rTMS	OK	M1 (unaffected or affected side) of the leg area	F: 1-20Hz; T: 1-30; P:600-2000; MT(%):90	1-40	TUG; 10MWT; Gait analysis	d410 Changing basic body position d450 Walking d460 Moving around in different locations	Sham or sham + MI + rehab or sham + rehab
8	Li et al., 2018 b	DOI 10.3233/RNN-170770	12	Moderate	tDCS	Mobility - tDCS	Presente	8	RCT	Serious	Serious	Non serious	Very serious	None	64	66	130	SMD: -0.35 (-0.70 to 0.01)	-0.35	-0.7	0.01	11	6	-355	0%; 0.71	Very low	No	Mixed protocols of tDCS	Ok	atDCS(affected M1), ctDCS (unaffected M1)	I: 1.5-2mA D: 7-20min ES: 35cm2	10 weeks	TUG; 6MWT; 10MWT	d410 Changing basic body position d450 Walking d460 Moving around in different locations	Sham tDCS + rehabilitation
	Li et al., 2018 b					Motor function - tDCS	Presente	4	RCT	Serious	Very serious	Non serious	Serious	None	49	35	84	SMD: -1.54 (-2.78 to -0.29)	-1.54	-2.78	-0.29	3	3	13	82%; <0.01	Very low	No	Mixed protocols of tDCS	OK	atDCS(affected M1), ctDCS (unaffected M1)	I: 2mA D: 10-25min ES: 7.07-35cm2	6-10 weeks	Lower limb motricity index; MRC	b730 Muscle power functions b760 Control of voluntary movement functions	Sham tDCS + physical therapy or rehabilitation
9	McIntyre et al., 2018	doi: 10.1016/j.pmrj.2017.10.001	8	Critically Low	TMS	Motor function - TMS	Presente	2	RCT	Very serious	Very serious	Non serious	Very serious	None	28	28	56	SMD: -0.34 (-0.97 to 0.30)	-0.34	-0.97	0.3	11	4	12	42%; NR	Very low	No	Low frequency rTMS	OK	M1 (unaffected)	F: 1Hz; T: 1; P:240-1500; MT(%):90	10 weeks	MAS	b735 Muscle tone functions	Sham rTMS + physical therapy or occupational therapy
10	O'Brien et al., 2018	doi:10.1111/ene.13643	13	High	TMS + tDCS	Upper limb activity - TMS	Presente	10	RCT	Non serious	Serious	Non serious	Very serious	None	109	102	211	SMD: -0.46 (-0.92 to 0.00)	-0.46	-0.92	1e-05	8	5	-354491	67%;<0.01	Very low	Not reported	Mixed protocols of rTMS	OK	M1 or PMd (unaffected or affected side)	F: 1-20Hz; T:NR; P:600-2000; MT(%):90-110	1-10 weeks	BBT; JTT; NHPT; PPT	d445 Hand and arm use d430 Lifting and carrying objects d440 Fine hand use	Sham rTMS or sham rTMS + motor training or CIMT or Brunnstrom hand manipulation
	O'Brien et al., 2018					Upper limb activity - tDCS	Presente	10	RCT	Non serious	Serious	Non serious	Very serious	None	86	81	167	SMD: -0.31 (-0.55 to -0.01)	-0.31	-0.55	-0.01	12	7	355	34%; 0.11	Very low	Not reported	Mixed protocols of tDCS	OK	M1 or PMd (unaffected or affected side)	I: 1-1.5mA D: 10-40 min ES: 25-35cm2	1-10 weeks	ARAT	d445 Hand and arm use d430 Lifting and carrying objects d440 Fine hand use	Sham tDCS or Sham tDCS + occupational theerapy or robot assisted training
11	Ghayour-Najafabadi et al., 2019	https://doi.org/10.1016/j.jstrokecerebrovasdis.2019.104412	14	Moderate	TMS	Motor function - TMS	Presente	6	RCT	Serious	Very serious	Non serious	Very serious	None	93	84	177	SMD: -0.01 (-0.31 to 0.29)	-0.01	-0.31	0.29	355	12	-13	77%; <0.01	Very low	No	Mixed protocols of rTMS	OK	M1 (unaffected or affected side) of the leg area or Cerebellum	F: 1-10Hz; T: NR; P:900-2000; MT(%):90-130	5-140	FMA-LL	b730 Muscle power functions b760 Control of voluntary movement functions	Without stimulation or Sham rTMS or Sham rTMS + physical therapy or mirror therapy or rehabitilitation
	Ghayour-Najafabadi et al., 2019					Mobility - TMS	Presente	8	RCT	Serious	Very serious	Non serious	Very serious	None	133	136	269	SMD: -0.55 (-0.93 to -0.16)	-0.55	-0.93	-0.16	7	5	23	0%; 0.62	Very low	No	Mixed protocols of rTMS	OK	M1 (unaffected or affected side) of the leg area or Cerebellum	F: 1-10Hz; T: NR; P:900-2000; MT(%):90-130	5-140	BBS; TUG	d410 Changing basic body position d415 Maintaining a body position d420 Transferring oneself d450 Walking d460 Moving around in different locations	Without stimulation or Sham rTMS or Sham rTMS + physical therapy or mirror therapy or rehabitilitation
12	Liu et al., 2019	https://doi.org/10.1016/j.apmr.2019.03.012	14	High	TMS	General neurological function - TMS	Presente	4	RCT	Non serious	Non serious	Serious	Serious	None	111	110	221	SMD: -0.91 (-1.19 to -0.63)	-0.91	-1.19	-0.63	5	4	6	0%; 0.94	Low	Yes (Headache and anxiety)	High frequency rTMS	Ok	LDLPFC	F: 10Hz; T: NR; P: NR; MT(%):80-110	10-20	NIHSS	b110 Consciousness functions b130 Energy and drive functions b140 Attention functions b310 Voice functions b320 Articulation functions b710 Mobility of joint functions b730 Muscle power functions	Fluoxetine or Citalopram or Sertraline/Deanxit or Sham stimulation
	Liu et al., 2019					ADL - TMS	Presente	3	RCT	Non serious	Non serious	Serious	Serious	None	157	156	313	SMD: -1.09 (-1.84 to -0.34)	-1.09	-1.84	-0.34	4	3	11	89%; <0.01	Low	Yes (Headache and anxiety)	High frequency rTMS	Ok	LDLPFC	F:10Hz; T:NR; P:NR; MT(%):60-90	10-60	BI	d450 Walking d410 Changing basic body position d530 Toileting d540 Dressing d550 Eating d510 Washing oneself d420 Transferring oneself	General treatment or general treatment + citalopram/fluoxetine
13	Tung et al., 2019	DOI: 10.1177/0269215519835889	13	Moderate	TMS	Motor function - TMS	Presente	7	RCT	Serious	Serious	Non serious	Serious	None	73	70	143	SMD: -0.66 (-1.00 to -0.32)	-0.66	-1	-0.32	6	4	12	0%; 0.56	Very low	Yes (dizziness and tingling)	Mixed protocols of rTMS	Ok	M1 (unaffected or affected side) of the leg area or Cerebellum or LDLPFC	F: 1-20Hz; T: NR; P:600-1500; MT(%):90-130	10-15	FMA-LL; brunnstrom recovery stage for lower limb; plantarflexion peak torque; lower limb motricity index	b730 Muscle power functions b760 Control of voluntary movement functions	Sham rTMS or sham rTMS + Task-oriented training or treadmill training or ankle strengthening exercise or movement therapy or physical therapy
	Tung et al., 2019					Mobility - TMS	Presente	6	RCT	Serious	Very serious	Non serious	Serious	None	75	60	135	SMD: -0.66 (-1.11 to -0.21)	-0.66	-1.11	-0.21	6	4	17	35%; 0.18	Very low	Yes (dizziness and tingling)	Mixed protocols of rTMS	Ok	M1 (unaffected or affected side) of the leg area or Cerebellum or LDLPFC	F: 1-10Hz; T:NR; P:600-1000; MT(%):90-110	5-40	BBS; FAC; Walking speed; ABMS II	d410 Changing basic body position d415 Maintaining a body position d420 Transferring oneself d450 Walking d460 Moving around in different locations	Sham rTMS or sham rTMS + Task-oriented training or treadmill training or ankle strengthening exercise or movement therapy or physical therapy
14	Van Lieshout et al., 2019	doi: 10.3389/fneur.2019.01269	13	Moderate	TMS	Motor function - TMS	Presente	15	RCT	Serious	Very serious	Non serious	Very serious	None	289	244	533	SMD: -0.46 (-0.84 to -0.09)	-0.46	-0.84	-0.09	8	5	40	66%; <0.01	Very low	NR	Mixed protocols of rTMS	OK	M1 or PMd (unaffected or affected side)	F: 1-5Hz; T: NR; P:240-1800; MT(%):80-120	5-24	FMA-UL	b730 Muscle power functions b760 Control of voluntary movement functions	Sham rTMS + conventional therapy or virtual reality or physical therapy or functional task practice
	Van Lieshout et al., 2019					Upper limb activity - TMS	Presente	20	RCT	Serious	Very serious	Non serious	Very serious	None	260	235	495	SMD: -0.17 (-0.44 to 0.09)	-0.17	-0.44	0.09	21	9	-40	49%; <0.01	Very low	NR	Mixed protocols of rTMS	OK	M1 or PMd (unaffected or affected side)	F: 1-5Hz; T:NR; P:240-1800; MT(%):80-120	5-24	ARAT; JTT; BBT; NHPT; PPT	d445 Hand and arm use d430 Lifting and carrying objects d440 Fine hand use	Sham rTMS + conventional therapy or virtual reality or physical therapy or functional task practice
15	Vaz et al., 2019	10.1080/10749357.2019.1565696	15	High	TMS + tDCS	Mobility - TMS	Presente	6	RCT	Non serious	Very serious	Non serious	Non serious	None	94	90	184	SMD: -0.97 (-1.28 to -0.66)	-0.97	-1.28	-0.66	4	4	6	0%; 0.72	Low	NR	Mixed protocols of rTMS	Ok	M1 (unaffected or affected side) of the leg area	F: 1-10Hz; T:NR; P:600-2000; MT(%):90-100	10-30	10m-WT; 3-D gait analysis; 6MWT; FAC; Motricity Index	d450 Walking d455 Moving around	sham rTMS or sham rTMS + physical therapy or task oriented training
	Vaz et al., 2019					Mobility - tDCS	Presente	19	RCT	Non serious	Very serious	Non serious	Serious	None	183	183	366	SMD: -0.10 (-0.31 to 0.11)	-0.1	-0.31	0.11	36	12	-33	25%;0.16	Very low	NR	Mixed protocols of tDCS	Ok	M1 (unaffected or affected side) of the leg area	I:1-2.5 mA D: 7-20 min ES: NR	2025-12-07	10m-WT; 3-D gait analysis; 6MWT; FAC	d450 Walking d455 Moving around	sham tDCS + gait training or physical therapy
16	Xiang et al., 2019	DOI: 10.1177/0269215519829897	12	Moderate	TMS	Motor function - TMS	Presente	43	RCT	Serious	Serious	Non serious	Non serious	None	739	743	1482	SMD: -0.50 (-0.60 to -0.39)	-0.5	-0.6	-0.39	8	7	10	0%; 0.68	Low	Yes (headaches, fatigue, drowsiness, neck pain, anxiety, cast irritation, and neurocardiogenic syncope)	Mixed protocols of rTMS	Ok	M1 (unaffected or affected side)	F: 1-25Hz; T: NR; P:150-1800; MT(%):80-130	1-24	BRS; FMA-UL	d445 Hand and arm use d430 Lifting and carrying objects d440 Fine hand use	Sham rTMS
	Xiang et al., 2019					ADL - TMS	Presente	7	RCT	Serious	Non serious	Non serious	Non serious	None	212	213	425	SMD: -0.82 (-1.05 to -0.59)	-0.82	-1.05	-0.59	5	4	7	0%; 0.78	Moderate	Yes (headaches, fatigue, drowsiness, neck pain, anxiety, cast irritation, and neurocardiogenic syncope)	Mixed protocols of rTMS	Ok	M1 (unaffected or affected side)	F: 1-25Hz; T: NR; P:150-1800; MT(%):80-130	1-24	BI; Activity Index	d450 Walking d410 Changing basic body position d530 Toileting d540 Dressing d550 Eating d510 Washing oneself d420 Transferring oneself	Sham rTMS
17	Allida et al., 2020	DOI: 10.1002/14651858.CD003437.pub4	16	High	TMS	ADL - TMS	Presente	2	RCT	Non serious	Non serious	Serious	Very serious	None	104	104	208	SMD: 1.84 (-1.40 to 5.08)	1.84	-1.4	5.08	3	3	-3	99%; <0.01	Very low	No	Mixed protocols of rTMS	Ok	LDLPFC or M1 (unaffected side)	F:1-10Hz; T:NR; P:1960; MT(%):80%	10-28	BI	d450 Walking d410 Changing basic body position d530 Toileting d540 Dressing d550 Eating d510 Washing oneself d420 Transferring oneself	Sham rTMS + usual care
	Allida et al., 2020					General neurological function - TMS	Presente	3	RCT	Non serious	Serious	Serious	Serious	None	145	145	290	SMD: -2.21 (-3.32 to -1.09)	-2.21	-3.32	-1.09	3	3	4	93%; <0.01	Very low	No	Mixed protocols of rTMS	Ok	LDLPFC or RDLPFC or M1 (unaffected side)	F: 1-10Hz; T:20-50; P:800-2500; MT(%):80-90	20-28	NIHSS	b110 Consciousness functions b130 Energy and drive functions b140 Attention functions b310 Voice functions b320 Articulation functions b710 Mobility of joint functions b730 Muscle power functions	Sham or usual care
18	Elsner et al., 2020	DOI: 10.1002/14651858.CD009645.pub4	16	High	tDCS	Upper limb activity - tDCS	Presente	24	RCT	Non serious	Serious	Non serious	Serious	None	459	333	792	SMD: -0.31 (-0.45 to -0.16)	-0.31	-0.45	-0.16	12	9	23	0%; 0.84	Low	No	Mixed protocols of tDCS	Ok	M1 (affected or unaffected side)	I: 0,5-2mA D: 7-40min ES: NR	10-30	ARAT	d445 Hand and arm use d430 Lifting and carrying objects d440 Fine hand use	Sham tDCS + physical therapy or occupational therapy or mirror therapy or virtual reality
	Elsner et al., 2020					Mobility - tDCS	Presente	12	RCT	Non serious	Serious	Non serious	Serious	None	135	123	258	SMD: -0.32 (-0.63 to -0.01)	-0.32	-0.63	-0.01	12	6	355	31%; 0.14	Very low	No	Mixed protocols of tDCS	Ok	M1 (affected or unaffected side)	I: 0,5-2mA D: 7-40min ES: NR	10-30	FAC; Walking velocity; Walking capacity	d450 Walking d455 Moving around	Sham tDCS + physical therapy or occupational therapy or mirror therapy or virtual reality
	Elsner et al., 2020					Motor function - tDCS	Presente	24	RCT	Non serious	Serious	Non serious	Very serious	None	459	333	792	SMD: -0.17 (-0.38 to 0.05)	-0.17	-0.38	0.05	21	10	-71	42%; 0.01	Very low	No	Mixed protocols of tDCS	Ok	M1 (affected or unaffected side)	I: 0,5-2mA D: 7-40min ES: NR	10-30	MAL; FMA-UL	b730 Muscle power functions b760 Control of voluntary movement functions	Sham tDCS + physical therapy or occupational therapy or mirror therapy or virtual reality
	Elsner et al., 2020					ADL - tDCS	Presente	19	RCT	Non serious	Serious	Non serious	Serious	None	459	333	792	SMD: -0.28 (-0.44 to -0.13)	-0.28	-0.44	-0.13	13	9	28	0%; 0.87	Low	No	Mixed protocols of tDCS	Ok	M1 (affected or unaffected side)	I: 0,5-2mA D: 7-40min ES: NR	10-30	Barthel Index; FIM	d450 Walking d410 Changing basic body position d530 Toileting d540 Dressing d550 Eating d510 Washing oneself d420 Transferring oneself	Sham tDCS + physical therapy or occupational therapy or mirror therapy or virtual reality
19	Kang et al., 2020	https://doi.org/10.1016/j.apmr.2019.09.003	8	Critically Low	TMS + tDCS	Mobility - TMS	Presente	9	RCT	Very serious	Very serious	Non serious	Serious	None	146	154	300	SMD: -0.48 (-0.76 to -0.19)	-0.48	-0.76	-0.19	8	5	19	37%; NR	Very low	NR	Mixed protocols of rTMS	Ok	M1 (unaffected or affected side) of the leg area or Cerebellum	F: 1-10Hz; T:NR; P:900-1000; MT(%):90-130	5-20	BBS; Tinetti Test; Trunk Control	d410 Changing basic body position d415 Maintaining a body position d420 Transferring oneself	Sham rTMS + physical therapy or mirror therapy or rehabilitation
	Kang et al., 2020					Mobility - tDCS	Presente	9	RCT	Very serious	Serious	Non serious	Very serious	None	132	132	264	SMD: -0.29 (-0.61 to 0.02)	-0.29	-0.61	0.02	13	6	-178	59%; NR	Very low	NR	Mixed protocols of tDCS	Ok	M1 (unaffected or affected side)	I: 1-2mA D: 10-20 min ES: 7.07-35 cm²	1-16	BBS	d410 Changing basic body position d415 Maintaining a body position d420 Transferring oneself	Sham tDCS + robotic training or physical therapy or rehabilitation or occupational therapy
20	Tien et al., 2020	DOI: 10.1097/MRR.0000000000000427	12	Moderate	tDCS	Mobility - tDCS	Presente	28	RCT	Serious	Serious	Non serious	Serious	None	400	395	795	SMD: -0.20 (-0.34 to -0.05)	-0.2	-0.34	-0.05	18	11	71	0%; 0.57	Very low	No	Mixed protocols of tDCS	Ok	Noncephalic areas; premotor cortex; M1 (unaffected or affected side)	I: 1-2 mA, D: 7-20 min ES: 10-35 cm²	1-20	RAG; TRT BBS	d410 Changing basic body position d415 Maintaining a body position d420 Transferring oneself	Sham tDCS
21	Comino-Suárez et al., 2021	https://doi.org/10.1186/s12984-021-00941-0	13	High	tDCS	Motor function - tDCS	Presente	10	RCT	Non serious	Very serious	Non serious	Very serious	None	186	156	342	SMD: -0.05 (-0.16 to 0.27)	-0.05	-0.16	0.27	71	23	-14	0%; 0.61	Very low	Yes (headache, fatigue, and tingling)	Mixed protocols of tDCS	Ok	atDCS (affected M1), ctDCS (unaffected M1)	I:1-2mA D: 7-30min ES:25-35cm²	2-36	FMA-UL	b730 Muscle power functions b760 Control of voluntary movement functions	Sham tDCS + robot assisted training or Lokomat or upper limb robotic assisted training
	Comino-Suárez et al., 2021					Upper limb activity - tDCS	Presente	3	RCT	Non serious	Very serious	Non serious	Very serious	None	50	84	134	SMD: -0.06 (-0.34 to 0.46)	-0.06	-0.34	0.46	60	11	-8	0%; 0.80	Very low	Yes (headache, fatigue, and tingling)	Mixed protocols of tDCS	Ok	atDCS (affected M1), ctDCS (unaffected M1)	I:1-2mA D: 7-30min ES:25-35cm²	2-36	Velocity in upper limb movements	d445 Hand and arm use	Sham tDCS + robot assisted training or Lokomat or upper limb robotic assisted training
	Comino-Suárez et al., 2021					ADL - tDCS	Presente	3	RCT	Non serious	Very serious	Non serious	Very serious	None	91	63	154	SMD: -0.18 (-0.51 to 0.15)	-0.18	-0.51	0.15	20	8	-24	0%; 0.66	Very low	Yes (headache, fatigue, and tingling)	Mixed protocols of tDCS	Ok	atDCS (affected M1), ctDCS (unaffected M1)	I:1-2mA D: 7-30min ES:25-35cm²	2-36	BI	d450 Walking d410 Changing basic body position d530 Toileting d540 Dressing d550 Eating d510 Washing oneself d420 Transferring oneself	Sham tDCS + robot assisted training or Lokomat or upper limb robotic assisted training
22	Reis et al., 2021	DOI: 10.1177/1545968321989353	15	High	tDCS	Upper limb activity - tDCS	Presente	5	RCT	Non serious	Serious	Non serious	Very serious	None	83	82	165	SMD: -0.03 (-0.33 to 0.28)	-0.03	-0.33	0.28	119	11	-13	0%; 0.45	Very low	NR	Mixed protocolos of tDCS	Ok	NR	I: NR D: 20-30min ES: NR	1-36	ARAT; BBT; WMFT	d445 Hand and arm use d430 Lifting and carrying objects d440 Fine hand use	Sham + robotic assisted training
23	Shao et al., 2021	http://dx.doi.org/10.1590/1414-431X202010010	14	High	TMS	General neurological function - TMS	Presente	3	RCT	Non serious	Non serious	Non serious	Very serious	None	68	68	136	SMD: -0.67 (-1.02 to -0.32)	-0.67	-1.02	-0.32	6	4	12	33%; 0.23	Low	No	Mixed protocols of rTMS	Ok	NR	NR	7-20	modified Scandinavian Stroke Scale; modified Brunnstrom Classification; NIHSS	b110 Consciousness functions b130 Energy and drive functions b140 Attention functions b310 Voice functions b320 Articulation functions b710 Mobility of joint functions b730 Muscle power functions	Routine treatment or Fluoxetine or Sham rTMS or Sham rTMS + deanxit
24	Sun et al., 2021	doi: 10.1002/pmrj.12399	8	Critically Low	tDCS	Motor function - tDCS	Presente	7	RCT	Very serious	Very serious	Non serious	Very serious	None	74	73	147	SMD: -0.47 (-0.78 to -0.16)	-0.47	-0.78	-0.16	8	5	23	NR; NR	Very low	NR	Mixed protocols of tDCS	Ok	Bihemispheric tDCS (affected and unaffected M1), atDCS (affected M1), ctDCS (affected M1)	I: 1-2 mA D: 13-40 min ES:35 cm²	6-20	FMA-UL	b730 Muscle power functions b760 Control of voluntary movement functions	Sham tDCS + rehabilitation or virtual reality or phisical therapy or occupational therapy
25	Van Hoornweder et al., 2021	https://doi.org/10.1016/j.clinph.2021.05.015	13	Moderate	tDCS	Motor function - tDCS	Presente	22	RCT	Non serious	Very serious	Non serious	Very serious	None	256	257	513	SMD: -0.64 (-0.99 to -0.29)	-0.64	-0.99	-0.29	6	4	13	68%; 0.01	Very low	NR	Mixed protocols of tDCS	Ok	atDCS (affected M1, PMd & SMA), ctDCS (unaffected M1), bihemispheric tDCS (affected M1+unaffected M1)	I:1-2mA D: 9-30min ES:16-35cm²	5-30	FMA-UL	b730 Muscle power functions b760 Control of voluntary movement functions	Sham tDCS + CIMT or robot assisted training or virtual reality or occupational therapy
26	Huang et al., 2022	10.1177/02692155211038097	14	High	tDCS	Motor function - tDCS	Presente	12	RCT	Non serious	Very serious	Non serious	Serious	None	458	346	804	SMD: -0.83 (-1.25 to -0.40)	-0.83	-1.25	-0.4	5	4	9	87%; <0.01	Very low	No	Mixed protocols of tDCS	Ok	atDCS (affected M1), ctDCS (unaffected M1/S1)	I: 0,5-2 mA D: 13-30 min ES:16-35 cm²	10-40	MAS	b735 Muscle tone functions	Sham tDCS + physical therapy or virtual reality or CIMT or robot-assisted trainimg or Electroacupuncture or Exercise training
27	Krogh et al., 2022	doi: 10.2340/jrm.v53.1097	14	High	TMS	Mobility - TMS	Presente	9	RCT	Non serious	Very serious	Non serious	Very serious	None	134	117	251	SMD: -0.20 (-0.45 to 0.05)	-0.2	-0.45	0.05	18	9	-71	0%; 0.62	Very low	NR	Mixed protocols of rTMS	Ok	M1 (unaffected or affected side)	F: 1-10Hz; T:15-50; P:900-2000; AMT(%):90-130	5-20	TUG, PASS, 10MWT, BBS, Gait velocity during non-standard gait analysis	d410 Changing basic body position d415 Maintaining a body position d420 Transferring oneself d450 Walking d460 Moving around in different locations	Sham rTMS or Sham rTMS + motor imagery or physical training or treadmill training
	Krogh et al., 2022					Motor function - TMS	Presente	5	RCT	Non serious	Serious	Non serious	Very serious	None	77	78	155	SMD: -0.19 (-0.51 to 0.13)	-0.19	-0.51	0.13	19	8	-28	9%; 0.24	Very low	NR	Mixed protocols of rTMS	Ok	M1 (unaffected or affected side)	F: 1-10Hz; T:15-50; P:900-2000; AMT(%):90-130	5-20	FMA-LL	b730 Muscle power functions b760 Control of voluntary movement functions	Sham rTMS or Sham rTMS + motor imagery or physical training or treadmill training
28	Ahmed et al., 2023	https://doi.org/10.1080/10749357.2022.2026278	10	Critically Low	TMS + tDCS	Motor function - TMS	Presente	8	RCT	Very serious	Very serious	Non serious	Serious	None	246	169	415	SMD: -0.04 (-0.24 to 0.16)	-0.04	-0.24	0.16	89	15	-23	37%; 0.14	Very low	NR	Mixed protocols of rTMS	Ok	M1 (unaffected or affected side)	F: 1-10Hz; T: NR; P: NR; MT(%): NR	10-24	FMA-UL	b730 Muscle power functions b760 Control of voluntary movement functions	Sham rTMS + Physical therapy or Occupational therapy or rehabilitation
	Ahmed et al., 2023					ADL - TMS	Presente	2	RCT	Very serious	Very serious	Non serious	Serious	None	65	63	128	SMD: -0.40 (-0.76 to -0.04)	-0.4	-0.76	-0.04	9	5	89	84%; 0.01	Very low	NR	Mixed protocols of rTMS	Ok	M1 (unaffected or affected side)	F: 1-10Hz; T:NR; P:NR; MT(%):NR	10-24	BI, FIM, MAL	d450 Walking d410 Changing basic body position d530 Toileting d540 Dressing d550 Eating d510 Washing oneself d420 Transferring oneself d445 Hand and arm use d430 Lifting and carrying objects d440 Fine hand use	Sham rTMS + Physical therapy or Occupational therapy or rehabilitation
	Ahmed et al., 2023					Motor function - tDCS	Presente	8	RCT	Very serious	Very serious	Non serious	Serious	None	151	156	307	SMD: -0.34 (-0.91 to 0.24)	-0.34	-0.91	0.24	11	5	-15	81%; <0.01	Very low	NR	Mixed protocols od tDCS	Ok	atDCS (affected M1), ctDCS (unaffected M1)	I:1-20mA D: 10-30min ES: NR	9-36	FMA-UL	b730 Muscle power functions b760 Control of voluntary movement functions	Sham tDCS + robot assisted training or virtual reality or occupational therapy or physical therapy or CIMT
	Ahmed et al., 2023					ADL - tDCS	Presente	3	RCT	Very serious	Very serious	Non serious	Non serious	None	70	71	141	SMD: -0.87 (-1.66 to 0.08)	-0.87	-1.66	0.08	5	3	-45	73%; 0.02	Very low	NR	Mixed protocols od tDCS	Ok	atDCS (affected M1), ctDCS (unaffected M1)	I:1-20mA D: 10-30min ES: NR	9-36	BI, FIM, MAL	d450 Walking d410 Changing basic body position d530 Toileting d540 Dressing d550 Eating d510 Washing oneself d420 Transferring oneself d445 Hand and arm use d430 Lifting and carrying objects d440 Fine hand use	Sham tDCS + robot assisted training or virtual reality or occupational therapy or physical therapy or CIMT
29	Chen et al., 2023 a	https://doi.org/10.1016/j.jstrokecerebrovasdis.2023.106982	12	Moderate	TMS	Motor function - TMS	Presente	8	RCT	Serious	Very serious	Serious	Non serious	None	330	217	547	SMD: -1.22 (-0.73 to -1.70)	-1.22	-0.73	-1.7	4	6	3	81%; <0.01	Very low	Yes (Headache and dizziness)	Mixed protocols of rTMS	Ok	M1 (unaffected or affected side) of the leg area	F: 1-10Hz; T: NR; P: NR; MT(%):80-100	10-20	FMA-LL	b730 Muscle power functions b760 Control of voluntary movement functions	Rehabilitation therapy + medical treatment or Physical therapy + medical treatment or sham rTMS + Rehabilitation therapy + medical treatment
	Chen et al., 2023 a					General neurological function - TMS	Presente	12	RCT	Serious	Very serious	Serious	Non serious	None	278	180	458	SMD: -0.94 (-1.33 to -0.54)	-0.94	-1.33	-0.54	5	4	7	68%; <0.01	Very low	Yes (Headache and dizziness)	Mixed protocols of rTMS	Ok	M1 (unaffected or affected side) of the leg area	F: 1-10Hz; T: NR; P: NR; MT(%):80-100	10-20	NIHSS	b110 Consciousness functions b130 Energy and drive functions b140 Attention functions b310 Voice functions b320 Articulation functions b710 Mobility of joint functions b730 Muscle power functions	Rehabilitation therapy + medical treatment or Physical therapy + medical treatment or sham rTMS + Rehabilitation therapy + medical treatment
	Chen et al., 2023 a					ADL - TMS	Presente	8	RCT	Serious	Serious	Serious	Serious	None	205	125	330	SMD: -1.28 (-1.55 to -1.02)	-1.28	-1.55	-1.02	4	3	4	97%; <0.01	Very low	Yes (Headache and dizziness)	Mixed protocols of rTMS	Ok	M1 (unaffected or affected side) of the leg area	F: 1-10Hz; T:NR; P:NR; MT(%):80-100	10-20	BI	d450 Walking d410 Changing basic body position d530 Toileting d540 Dressing d550 Eating d510 Washing oneself d420 Transferring oneself	Rehabilitation therapy + medical treatment or Physical therapy + medical treatment or sham rTMS + Rehabilitation therapy + medical treatment
30	Chen et al., 2023 b	https://doi.org/10.1007/s10072-023-06779-9	10	Critically Low	TMS	ADL - TMS	Presente	10	RCT	Very serious	Non serious	Non serious	Non serious	None	330	328	658	SMD: -1.15 (-1.57 to -0.73)	-1.15	-1.57	-0.73	4	3	6	84%; <0.01	Low	Yes (headaches, dizziness, palpitation, anxiety, gastrointestinal symptoms)	High frequency rTMS	Ok	DLPFC (Left or affected side)	F: 3-10 Hz; T: NR; P: NR; MT(%): 80-120	20-48	MBI; BI	d450 Walking d410 Changing basic body position d530 Toileting d540 Dressing d550 Eating d510 Washing oneself d420 Transferring oneself	Sham rTMS + cognitive training or routine medication treatment or rehabilitation or hyperbaric oxigen therapy or accupunture or occupational therapy
31	Gao et al., 2023	https://doi.org/10.1016/j.arr.2023.101919	13	High	TMS	ADL - TMS	Presente	4	RCT	Non serious	Very serious	Non serious	Serious	None	61	56	117	SMD: -0.42 (-0.06 to -0.78)	-0.42	-0.06	-0.78	9	60	5	0%; NR	Very low	Yes (Headache and dizziness)	Mixed protocols of rTMS	Ok	DLPFC (Left side)	F: 1-10Hz; T: NR; P: 900-2000; MT(%): 80-100	10-20	MBI	d450 Walking d410 Changing basic body position d530 Toileting d540 Dressing d550 Eating d510 Washing oneself d420 Transferring oneself	NR
32	Hofmeijer et al., 2023	DOI: 10.1161/STROKEAHA.123.043159	13	Moderate	TMS	Mobility - TMS	Presente	4	RCT	Serious	Very serious	Non serious	Very serious	None	56	56	112	SMD: -0.68 (-1.38 to 0.02)	-0.68	-1.38	0.02	6	3	-178	69%; 0.02	Very low	NR	Mixed protocols of rTMS	Ok	M1 (affected or unaffected side)	F: 1-10Hz; T: NR; P: 1000-1200; MT(%): 90	5-21	FAC; BBS	d410 Changing basic body position d415 Maintaining a body position d420 Transferring oneself d450 Walking d460 Moving around in different locations	Sham rTMS + rehabitilation or physical therapy or virtual reality
	Hofmeijer et al., 2023					Motor function - TMS	Presente	10	RCT	Serious	Very serious	Non serious	Serious	None	323	219	542	SMD: -0.94 (-1.43 to -0.45)	-0.94	-1.43	-0.45	5	3	9	83%; <0.01	Very low	NR	Mixed protocols of rTMS	Ok	M1 (affected or unaffected side)	F: 1-10Hz; T: NR; P: 100-1800; MT(%): 80-90	10-24	FMA-UL	b730 Muscle power functions b760 Control of voluntary movement functions	Sham rTMS + rehabitilation or physical therapy or virtual reality
	Hofmeijer et al., 2023					ADL - TMS	Presente	8	RCT	Serious	Very serious	Non serious	Serious	None	160	105	265	SMD: -1.72 (-2.48 to -0.96)	-1.72	-2.48	-0.96	3	3	4	80%<0.01	Very low	NR	Mixed protocols of rTMS	Ok	M1 (affected or unaffected side)	F: 1-20Hz; T: NR; P: 900-1200; MT(%): 80-130	5-24	BI; FIM	d450 Walking d410 Changing basic body position d530 Toileting d540 Dressing d550 Eating d510 Washing oneself d420 Transferring oneself	Sham rTMS + rehabitilation or physical therapy or virtual reality
33	Lima et al., 2023	10.1080/01616412.2023.2211457	15	High	tDCS	Motor function - tDCS	Presente	6	RCT	Non serious	Very serious	Non serious	Very serious	None	123	123	246	SMD: -0.36 (-0.90 to 0.18)	-0.36	-0.9	0.18	10	5	-20	76%; <0.01	Very low	NR	Mixed protocols of tDCS	Ok	M1 (affected or unaffected side)	I: NR D: NR ES: NR	NR	FMA-LL	b730 Muscle power functions b760 Control of voluntary movement functions	Sham tDCS + PT or OT
	Lima et al., 2023					Mobility - tDCS	Presente	7	RCT	Non serious	Very serious	Non serious	Very serious	None	73	73	146	SMD: -0.41 (-0.75 to -0.08)	-0.41	-0.75	-0.08	9	5	45	0%; 0.79	Very low	NR	Mixed protocols of tDCS	Ok	M1 (affected or unaffected side)	I: NR D: NR ES: NR	NR	TUG; BBS	d410 Changing basic body position d415 Maintaining a body position d420 Transferring oneself d450 Walking d460 Moving around in different locations	Sham tDCS + PT or robot assisted training
34	Xi et al., 2023	http://dx.doi.org/10.1097/MD.0000000000033771	12	Moderate	TMS	Upper limb activity - TMS	Presente	3	RCT	Serious	Very serious	Non serious	Very serious	None	24	30	54	SMD: -0.34 (-0.88 to 0.20)	-0.34	-0.88	0.2	11	5	-18	0%; NR	Very low	NR	Mixed protocols of rTMS	Ok	M1 (affected or unaffected side)	F: 1-20Hz; T: NR; P: 1200-1500; MT(%): 90-110	8-20	BBT	d445 Hand and arm use d430 Lifting and carrying objects d440 Fine hand use	Sham rTMS + task-oriented training
	Xi et al., 2023					Motor function - TMS	Presente	8	RCT	Serious	Serious	Non serious	Non serious	None	245	241	486	SMD: -1.07 (-0.88 to -1.25)	-1.07	-0.88	-1.25	4	5	4	0%; NR	Low	NR	Mixed protocols of rTMS	Ok	M1 (affected or unaffected side); left posterior parietal cortex	F: 1-10Hz; T: NR; P: 200-2000; MT(%): 80-90	24-48	FMA-UL	b730 Muscle power functions b760 Control of voluntary movement functions	Sham rTMS + task-oriented training or Physical therapy or rehabilitation
	Xi et al., 2023					ADL - TMS	Presente	3	RCT	Serious	Very serious	Non serious	Serious	None	100	97	197	SMD: -0.74 (-1.03 to -0.45)	-0.74	-1.03	-0.45	6	4	9	39.9%; NR	Very low	NR	Mixed protocols of rTMS	Ok	M1 (affected or unaffected side); left posterior parietal cortex	F: 1-10Hz; T: NR; P: 600-2000; MT(%): 80-90	24-42	BI	d450 Walking d410 Changing basic body position d530 Toileting d540 Dressing d550 Eating d510 Washing oneself d420 Transferring oneself	Sham rTMS + task-oriented training
35	Xie et al., 2023	https://doi.org/10.31083/j.jin2205131	13	High	TMS	ADL - TMS	Presente	3	RCT	Non serious	Serious	Non serious	Very serious	None	58	56	114	SMD: -0.03 (-0.50 to 0.44)	-0.03	-0.5	0.44	119	8	-9	36%; 0.21	Very low	No	Mixed protocols of rTMS	Ok	DLPFC (Left, bilateral or unaffected side)	F: 1-10Hz; T: NR; P: NR MT(%): 80-120	20	MBI	d450 Walking d410 Changing basic body position d530 Toileting d540 Dressing d550 Eating d510 Washing oneself d420 Transferring oneself	Sham rTMS or no intervention
36	Zhou et al., 2023	https://doi.org/10.1093/gerona/glac158	12	Moderate	TMS	Mobility - TMS	Presente	48	RCT	Serious	Very serious	Non serious	Serious	None	317	300	617	SMD: -0.35 (-0.45 to -0.24)	-0.35	-0.45	-0.24	11	9	15	0%; 0.99	Very low	No	Mixed protocols of rTMS	Ok	M1 (affected and unaffected side); supplementary motor area; DLPFC; cerebellum	F: 0.5-50Hz; T: NR; P: 450-3000; MT(%): 80-130	1-15	BBS; TUG; Walking performance	d410 Changing basic body position d415 Maintaining a body position d420 Transferring oneself d450 Walking d460 Moving around in different locations	Sham rTMS
37	Chen et al., 2024	10.1097/MD.0000000000040098	13	Moderate	TMS	Motor function - TMS	Presente	5	RCT	Serious	Serious	Non serious	Very serious	None	83	83	166	SMD: -0.37 (-1.07 to 0.34)	-0.37	-1.07	0.34	10	4	-11	79%; <0.01	Very low	No	iTBS	Ok	M1 (affected and unaffected side); cerebellum	F: 5 Hz; T: 20-40; P: 600-1200; MT(%): 70-100	10-30	FMA-LL	b730 Muscle power functions b760 Control of voluntary movement functions	Sham rTMS + rehabilitation or suspension exercise
						Mobility - TMS	Presente	11	RCT	Serious	Serious	Non serious	Very serious	None	169	169	338	SMD: -0.36 (-0.85 to 0.12)	-0.36	-0.85	0.12	10	5	-30	78%; 0.01	Very low	No	iTBS	Ok	M1 (affected and unaffected side); cerebellum	F: 5 Hz; T: 20-40; P: 600-1200; MT(%): 70-100	10-30	BBS; TUG; 10mWT	d410 Changing basic body position d415 Maintaining a body position d420 Transferring oneself d450 Walking d460 Moving around in different locations	Sham rTMS + rehabilitation or suspension exercise
						ADL - TMS	Presente	3	RCT	Serious	Serious	Non serious	Very serious	None	47	47	94	SMD: -0.31 (-0.72 to 0.10)	-0.31	-0.72	0.1	12	6	-36	0%; 0.80	Very low	No	iTBS	Ok	M1 (affected and unaffected side); cerebellum	F: 5 Hz; T: 20-40; P: 600-1200; MT(%): 80-100	10-20	MBI	d450 Walking d410 Changing basic body position d530 Toileting d540 Dressing d550 Eating d510 Washing oneself d420 Transferring oneself	Sham rTMS + rehabilitation or suspension exercise
38	Daoud et al., 2024	10.1007/s10072-023-07267-w	11	Moderate	TMS	ADL - TMS	Presente	4	RCT	Serious	Serious	Non serious	Serious	None	120	117	237	SMD: -0.82 (-1.08 to -0.55)	-0.82	-1.08	-0.55	5	4	7	0%; 0.48	Very low	No	iTBS	Ok	DLPFC (left)	F: 5 Hz; T: 20-40; P: 600-1200; MT(%): 56-80	20-30	BI; MBI	d450 Walking d410 Changing basic body position d530 Toileting d540 Dressing d550 Eating d510 Washing oneself d420 Transferring oneself	Sham rTMS or sham rTMS + cognitive training
39	Jiang et al., 2024	https://doi.org/10.1186/s12883-023-03492-0	13	High	TMS	Motor function - TMS	Presente	18	RCT	Non serious	Very serious	Non serious	Non serious	None	226	219	445	SMD: -0.59 (-0.93 to -0.25)	-0.59	-0.93	-0.25	7	5	15	65%; <0.01	Low	No	Mixed protocols of TBS	Ok	M1 (affected and/or unaffected side); cerebellum (ipsilesional)	F: 5Hz; T: 1-40; P: 600-1200; MT(%): 60-110	9-30	FMA-UL; FMA-LL; MAS	b730 Muscle power functions b760 Control of voluntary movement functions b735 Muscle tone functions	Sham TBS + PT or rehabilitation or virtual reality or RAT
						Upper limb activity - TMS	Presente	11	RCT	Non serious	Very serious	Non serious	Very serious	None	123	119	242	SMD: -0.00 (-0.02 to 0.02)	-1e-05	-0.02	0.02	354491	178	-178	94%; <0.01	Very low	No	Mixed protocols of TBS	Ok	M1 (affected or unaffected side)	F: 5Hz; T: 1-20; P: 600; MT(%): 80-90	10	NHPT; ARAT	d445 Hand and arm use d430 Lifting and carrying objects d440 Fine hand use	Sham TBS + PT or rehabilitation
						Mobility - TMS	Presente	3	RCT	Non serious	Very serious	Non serious	Very serious	Non serious	42	42	84	SMD: -0.61 (-1.32 to 0.10)	-0.61	-1.32	0.1	6	4	-36	59%; 0.08	Very low	No	iTBS	Ok	M1 (affected and unaffected side); cerebellum (ipsilesional)	F: 5Hz; T: 20-40; P: 600-1200; MT(%): 80-100	10-30	BBS	d410 Changing basic body position d415 Maintaining a body position d420 Transferring oneself	Sham TBS + PT or rehabilitation
40	Lima et al., 2024	10.1177/02692155231200086	14	High	tDCS	Motor function - tDCS	Presente	9	RCT	Very serious	Very serious	Non serious	Very serious	None	146	135	281	SMD: -0.07 (-0.31 to 0.16)	-0.07	-0.31	0.16	51	12	23	0%; 1.00	Very low	No	Mixed protocols of tDCS	Ok	M1 (affected and unaffected side)	I:1-2 mA D: 10-30 min ES: NR	NR	FMA-UL	b730 Muscle power functions b760 Control of voluntary movement functions	Sham tDCS + Robot assisted training
41	Ren et al., 2024	https://doi.org/10.1002/brb3.70145	12	Moderate	TMS + tDCS	Motor function - TMS	Presente	2	RCT	Serious	Very serious	Non serious	Very serious	None	36	34	70	SMD: -0.83 (-2.16 to 0.51)	-0.83	-2.16	0.51	5	3	-8	86%; <0.01	Very low	No	Mixed protocols of rTMS	Ok	M1 (affected and unaffected side)	F: 1-10 Hz; T: NR; P: 900-1000; MT(%): 80-120	15-30	FMA-UL	b730 Muscle power functions b760 Control of voluntary movement functions	Sham rTMS
						Motor function - tDCS	Presente	4	RCT	Serious	Serious	Non serious	Very serious	None	53	49	102	SMD: -0.24 (-0.63 to 0.15)	-0.24	-0.63	0.15	15	6	-24	0%; 0.75	Very low	No	Bihemispheric tDCS	Ok	M1 (affected and unaffected side)	I:NR D: 20-30 min ES: NR	5-20	FMA-UL	b730 Muscle power functions b760 Control of voluntary movement functions	Sham tDCS
42	Tang et al., 2024	10.1177/02692155241235336	12	High	tDCS	Motor function - tDCS	Presente	42	RCT	Non serious	Very serious	Non serious	Very serious	None	807	789	1596	SMD: -0.22 (-0.32 to -0.12)	-0.22	-0.32	-0.12	17	12	30	49%; <0.01	Very low	No	Mixed protocols of tDCS	Ok	M1 (affected and unaffected side); supplementary motor area; DLPFC; cerebellum	I:1-2 mA D: 9-40 min ES: 16-35 cm²	5-60	FMA-UL; ARAT	b730 Muscle power functions b760 Control of voluntary movement functions	NR
						ADL - tDCS	Presente	11	RCT	Non serious	Very serious	Non serious	Non serious	None	283	289	572	SMD: -0.37 (-0.53 to -0.20)	-0.37	-0.53	-0.2	10	7	18	37%; 0.07	Low	No	Mixed protocols of tDCS	Ok	M1 (affected and unaffected side)	I:1.5-2 mA D: 10-30 min ES: 22-35 cm²	10-60	BI	d450 Walking d410 Changing basic body position d530 Toileting d540 Dressing d550 Eating d510 Washing oneself d420 Transferring oneself	NR
43	Wang et al., 2024 a	https://doi.org/10.1186/s12883-024-03720-1	12	Moderate	TMS	Mobility - TMS	Presente	12	RCT	Serious	Very serious	Non serious	Non serious	None	270	260	530	SMD: -0.65 (-0.98 to -0.32)	-0.65	-0.98	-0.32	6	4	12	69%; <0.01	Very low	Yes (Vertigo)	Mixed protocols of rTMS	Ok	Cerebellum (contra or ipsilesional)	F: 1-10Hz; T: NR; P: 600-1200; MT(%): 80-100	10-21	BBS, TUG	d410 Changing basic body position d415 Maintaining a body position d420 Transferring oneself d450 Walking d460 Moving around in different locations	Sham + PT or rehabilitation or mirror therapy
						ADL - TMS	Presente	6	RCT	Serious	Very serious	Non serious	Serious	None	140	140	280	SMD: -0.83 (-1.41 to -0.25)	-0.83	-1.41	-0.25	6	3	15	80%; <0.01	Very low	No	Mixed protocols of rTMS	Ok	Cerebellum (contra or ipsilesional)	F: 5-10Hz; T: 20-40; P: 600-1200; MT(%): 80-110	10-24	BI, MBI	d450 Walking d410 Changing basic body position d530 Toileting d540 Dressing d550 Eating d510 Washing oneself d420 Transferring oneself	Rehabilitation or sham rTMS + rehabilitation or sham + PT or sham +rehabilitation + accupunture
44	Wang et al., 2024 b	https://doi.org/10.1186/s12984-024-01486-8	14	Moderate	TMS	Motor function - TMS	Presente	3	RCT	Serious	Serious	Non serious	Serious	None	50	44	94	SMD: -0.89 (-1.31 to -0.48)	-0.89	-1.31	-0.48	5	4	8	0%; NR	Very low	NR	Mixed protocols of rTMS	Ok	M1 (affected and unaffected side)	F: 1-10Hz; T: 1-NR; P: 1000-1200; MT(%): 80-90	15-40	FMA-UL	b730 Muscle power functions b760 Control of voluntary movement functions	Rehabilitation or sham rTMS + rehabilitation
						ADL - TMS	Presente	3	RCT	Serious	Serious	Non serious	Serious	None	50	44	94	SMD: -0.92 (-1.34 to -0.51)	-0.92	-1.34	-0.51	5	4	8	0%; NR	Very low	NR	Mixed protocols of rTMS	Ok	M1 (affected and unaffected side)	F: 1-10Hz; T: 1-NR; P: 1000-1200; MT(%): 80-90	15-40	BI, MBI	d450 Walking d410 Changing basic body position d530 Toileting d540 Dressing d550 Eating d510 Washing oneself d420 Transferring oneself	Rehabilitation or sham rTMS + rehabilitation
45	Zeng et al., 2024	https://doi.org/10.1007/s12311-024-01660-7	14	High	TMS	Motor function - TMS	Presente	4	RCT	Non serious	Very serious	Non serious	Serious	None	93	94	187	SMD: -0.89 (-1.19 to -0.58)	-0.89	-1.19	-0.58	5	4	7	0%; 0.42	Very low	NR	Mixed protocols of rTMS	Ok	Cerebellum (contralesional)	F: 1-10Hz; T: 1-NR; P: 600-1600; MT(%): 80-110	10-20	FMA-LL	b730 Muscle power functions b760 Control of voluntary movement functions	Sham + PT or rehabilitation
						Mobility - TMS	Presente	8	RCT	Non serious	Very serious	Non serious	Serious	None	184	173	357	SMD: -0.86 (-1.34 to -0.38)	-0.86	-1.34	-0.38	5	4	10	76%; <0.01	Very low	NR	Mixed protocols of rTMS	Ok	Cerebellum (contra or ipsilesional)	F: 1-10Hz; T: 1-NR; P: 600-1000; MT(%): 80-110	5-21	BBS	d410 Changing basic body position d415 Maintaining a body position d420 Transferring oneself	Sham + PT or rehabilitation
46	Zhang et al., 2024a	https://doi.org/10.1186/s12984-024-01474-y	13	High	tDCS	ADL - tDCS	Presente	2	RCT	Non serious	Non serious	Non serious	Very serious	None	40	39	79	SMD: -0.29 (-0.74 to 0.15)	-0.29	-0.74	0.15	13	6	-24	0%; 0.356	Low	NR	Cathodal tDCS	Ok	M1 (unaffected side)	I: 2 mA D: 20-30 min ES: NR	10-15	MBI	d450 Walking d410 Changing basic body position d530 Toileting d540 Dressing d550 Eating d510 Washing oneself d420 Transferring oneself	Sham tDCS + VR or rehabilitation
47	Zhang et al., 2024b	https://doi.org/10.1515/revneuro-2024-0030	12	Moderate	TMS	Motor function -TMS	Presente	14	RCT	Serious	Very serious	Serious	Serious	None	197	182	379	SMD: -0.65 (-1.08 to -0.21)	-0.65	-1.08	-0.21	6	4	17	76.2%; <0.01	Very low	NR	Mixed protocols of TBS	Ok	M1 (affected or unaffected side)	F: 5Hz; T: 20-40; P: 600-1200; MT(%): 60-110	9-30	FMA-UL	b730 Muscle power functions b760 Control of voluntary movement functions	Sham + rehabilitation or PT or RAT or VR
						Upper limb activity - TMS	Presente	19	RCT	Serious	Very serious	Serious	Non serious	None	264	223	487	SMD: -0.50 (-0.73 to -0.27)	-0.5	-0.73	-0.27	8	6	14	34.2%; 0.07	Very low	NR	Mixed protocols of TBS	Ok	M1 (affected or unaffected side)	F: 5Hz; T: 20-40; P: 600-1200; MT(%): 60-110	9-30	ARAT; WMFT; JTT	d445 Hand and arm use d430 Lifting and carrying objects d440 Fine hand use	Sham + rehabilitation or PT or RAT or VR
48	Zhu et al., 2024	10.1186/s12883-024-03726-9	9	Low	TMS	ADL - TMS	Presente	3	RCT	Very serious	Serious	Non serious	Serious	None	68	58	126	SMD: -0.76 (-1.30 to -0.22)	-0.76	-1.3	-0.22	5	4	17	52.6%; 0.12	Very low	No	Mixed protocols of rTMS	Ok	DLPFC (left or unaffected side)	F: 1-10Hz; T: 1-20; P: 600-1000; MT(%): NR	5-30	MBI	d450 Walking d410 Changing basic body position d530 Toileting d540 Dressing d550 Eating d510 Washing oneself d420 Transferring oneself	NR
49	Barreto et al., 2025	DOI: 10.1177/02692155251328945	16	High	TMS	Motor function - TMS	Presente	35	RCT	Non serious	Serious	Non serious	Serious	None	897	700	1597	SMD: -0.57 (-0.82 to -0.32)	-0.57	-0.82	-0.32	7	5	12	81%; <0.01	Low	NR	Mixed protocols of rTMS	Ok	M1 (affected or unaffected side); left posterior parietal cortex	F: 1-20Hz; T: NR; P: 200-2000; MT(%): 60-120	5-24	FMA-UL; WMFT; ARAT	b730 Muscle power functions b760 Control of voluntary movement functions	Sham rTMS + physical therapy or occupational therapy or virtual reality or electrotherapy or Brunnstrom hand manipulation or CIMT or task oriented training
50	Jia et al., 2025	https://doi.org/10.1186/s12883-025-04112-9	13	High	TMS	Motor function - TMS	Presente	18	RCT	Non serious	Very serious	Non serious	Non serious	None	362	361	723	SMD: -0.45 (-0.65 to -0.25)	-0.45	-0.65	-0.25	9	6	15	35%; 0.07	Low	NR	Mixed protocols of rTMS	Ok	M1 (affected and/or unaffected side); left DLPFC	F: 1-20Hz; T: NR; P: 600-1600; MT(%): 80-130	5-21	FMA-LL	b730 Muscle power functions b760 Control of voluntary movement functions	NR
						Mobility - TMS	Presente	7	RCT	Non serious	Very serious	Non serious	Very serious	None	72	58	130	SMD: -0.28 (-0.78 to 0.21)	-0.28	-0.78	0.21	13	5	-17	20%; 0.28	Very low	NR	Mixed protocols of rTMS	Ok	M1 (affected and/or unaffected side); left DLPFC	F: 1-20Hz; T: NR; P: 600-1600; MT(%): 80-100	2025-11-05	10mWT; BBS	d410 Changing basic body position d415 Maintaining a body position d420 Transferring oneself d450 Walking d460 Moving around in different locations	NR
51	Ma et al., 2025	https://doi.org/10.1007/s10072-024-07961-3	11	Moderate	TMS	Motor function - TMS	Presente	10	RCT	Serious	Very serious	Non serious	Non serious	None	255	259	514	SMD: -1.14 (-1.69 to -0.58)	-1.14	-1.69	-0.58	4	3	7	87%; <0.01	Very low	NR	Mixed protocols of rTMS	Ok	M1 (affected and/or unaffected side); affected DLPFC	F: 1-10Hz; T: NR; P: NR; MT(%): 80-100	10-20	NR	NR	Sham rTMS or rehabilitation or accupunture or ganglion block or cold water bath therapy
52	Usman et al., 2025	https://doi.org/10.1007/s10072-024-07768-2	14	High	tDCS	Mobility - tDCS	Presente	3	RCT	Non serious	Serious	Non serious	Very serious	None	65	63	128	SMD: -0.25 (-0.59 to 0.10)	-0.25	-0.59	0.1	15	7	-36	0%; 0.89	Very low	No	Mixed protocols of tDCS	Ok	M1 (affected and/or unaffected side)	I:1-2 mA D: 15-20 min ES: 1.75-25 cm²	2025-12-04	Gait speed	d450 Walking	Sham tDCS or sham tDCS + HIIT
53	Wang et al., 2025	https://doi.org/10.1016/j.brainresbull.2025.111341	13	Moderate	TMS	Mobility - TMS	Presente	10	RCT	Serious	Very serious	Non serious	Very serious	None	164	139	303	SMD: -0.29 (-0.52 to -0.05)	-0.29	-0.52	-0.05	13	7	71	20%; 0.25	Very low	No	Mixed protocols of rTMS	Ok	Cerebellum (contra or ipsilesional)	F: 1-5Hz; T: 1-40; P: 600-1200; MT(%): 80-100	5-15	BBS; TUG; 10mWT	d410 Changing basic body position d415 Maintaining a body position d420 Transferring oneself d450 Walking d460 Moving around in different locations	Sham + PT
						Motor function - TMS	Presente	3	RCT	Serious	Serious	Non serious	Very serious	None	45	45	90	SMD: -0.38 (-0.81 to 0.04)	-0.38	-0.81	0.04	10	5	-89	67%; 0.05	Very low	No	iTBS	Ok	Cerebellum (contralesional)	F: 5Hz; T: 20-40; P: 600-1200; MT(%): 80	10	FMA-LL	b730 Muscle power functions b760 Control of voluntary movement functions"	Sham + PT
						ADL - TMS	Presente	4	RCT	Serious	Serious	Non serious	Very serious	None	60	60	120	SMD: -0.37 (-0.74 to -0.01)	-0.37	-0.74	-0.01	10	6	355	0%; 0.67	Very low	No	iTBS	Ok	Cerebellum (contralesional)	F: 5Hz; T: 20-40; P: 600-1200; MT(%): 80	10-20	BI, MBI	d450 Walking d410 Changing basic body position d530 Toileting d540 Dressing d550 Eating d510 Washing oneself d420 Transferring oneself	Sham + PT or rehabilitation
54	Xie et al., 2025	https://doi.org/10.1186/s13643-025-02794-3	13	Moderate	TMS	Motor function - TMS	Presente	36	RCT	Serious	Very serious	Non serious	Non serious	None	878	776	1654	SMD: -0.49 (-0.59 to -0.39)	-0.49	-0.59	-0.39	8	7	10	35%; 0.02	Very low	Yes (seizure, headache, drowsiness)	Mixed protocols of rTMS	Ok	M1 (affected and/or unaffected side); left DLPFC; premotor cortex (contralateral); cerebellum (ipsilateral)	F: 0.1-20Hz; T: NR; P: 200-7500; MT(%): 80-130	5-40	FMA-UL; FMA-LL	b730 Muscle power functions b760 Control of voluntary movement functions	Sham + rehabilitation or PT or OT or rehabilitation
						General neurological function - TMS	Presente	12	RCT	Serious	Very serious	Non serious	Very serious	None	351	299	650	SMD: -0.33 (-0.71 to 0.05)	-0.33	-0.71	0.05	11	6	-71	81%; <0.01	Very low	Yes (seizure, headache, drowsiness)	Mixed protocols of rTMS	Ok	M1 (affected and/or unaffected side)	F: 1-10Hz; T: NR; P: 900-1800; MT(%): 80-120	5-20	NIHSS	b110 Consciousness functions b130 Energy and drive functions b140 Attention functions b310 Voice functions b320 Articulation functions b710 Mobility of joint functions b730 Muscle power functions	Sham + rehabilitation or PT
						ADL - TMS	Presente	20	RCT	Serious	Very serious	Non serious	Non serious	None	419	406	825	SMD: -0.64 (-1.00 to -0.28)	-0.64	-1	-0.28	6	4	13	83%; <0.01	Very low	Yes (seizure, headache, drowsiness)	Mixed protocols of rTMS	Ok	M1 (affected and/or unaffected side)	F: 0.5-10Hz; T: NR; P: 200-1200; MT(%): 80-130	5-40	MBI	d450 Walking d410 Changing basic body position d530 Toileting d540 Dressing d550 Eating d510 Washing oneself d420 Transferring oneself	Sham + rehabilitation or PT or OT or rehabilitation
55	Yu et al., 2025	https://doi.org/10.1016/j.jstrokecerebrovasdis.2024.108112	10	Critically low	tDCS	Motor function - tDCS	Presente	13	RCT	Very serious	Serious	Non serious	Serious	None	388	399	787	SMD: - 0.47 (-0.86 to -0.07)	-0.47	-0.86	-0.07	8	5	51	86%; <0.01	Very low	Yes (headache, tingling, burning, itching)	Anodal tDCS	Ok	M1 (affected side)	I: 1-2 mA D: 20-45 min ES: 25-50 cm²	5-36	FMA-UL	b730 Muscle power functions b760 Control of voluntary movement functions	Sham tDCS + rehabilitation or accupunture or PT or RT
						Upper limb activity - tDCS	Presente	3	RCT	Very serious	Non serious	Non serious	Serious	None	94	96	190	SMD: -0.59 (-0.89 to -0.30)	-0.59	-0.89	-0.3	7	5	12	17%; 0.30	Very low	No	Anodal tDCS	Ok	M1 (affected side)	I: 1-2 mA D: 20-45 min ES: 25-50 cm²	12-24	WMFT	d445 Hand and arm use d430 Lifting and carrying objects d440 Fine hand use	Sham tDCS + rehabilitation or accupunture or PT
						ADL - tDCS	Presente	9	RCT	Very serious	Non serious	Non serious	Non serious	None	238	239	477	SMD: -0.95 (-1.15 to -0.75)	-0.95	-1.15	-0.75	5	4	5	88%; <0.01	Low	Yes (headache, tingling, burning, itching)	Anodal tDCS	Ok	M1 (affected side)	I: 1-2 mA D: 20-45 min ES: 25-50 cm²	5-36	BI	d450 Walking d410 Changing basic body position d530 Toileting d540 Dressing d550 Eating d510 Washing oneself d420 Transferring oneself	Sham tDCS + rehabilitation or accupunture or PT or RT
56	Zhang et al., 2025	https://doi.org/10.1016/j.neurom.2024.07.010	12	Moderate	TMS	Motor function -TMS	Presente	37	RCT	Serious	Very serious	Non serious	Non serious	None	773	712	1485	SMD: -0.65 (-0.95 to -0.36)	-0.65	-0.95	-0.36	6	5	10	86%; <0.01	Very low	NR	Mixed protocols of rTMS	Ok	M1 (affected and unaffected side); cerebellum (ipsilesional); premotor cortex (unaffected side); S1 (affected side)	F: 1-20Hz; T: NR; P: 500-2000; MT(%): 20-120	5-20	FMA-UL	b730 Muscle power functions b760 Control of voluntary movement functions	Sham + PT or OT
Abbreviations:	10MWT, 10-metre walking test; 6MWT, 6-minute Walk Test; 9HPT, 9-Hole Peg Test; AT, The albert test; ABMS-II, Ability for Basic Movement Scale II; ARAT, Action Research Arm Test; AS, Ashworth spasticity; b-tDCS, bilateral-tDCS; BDLPFC, bilateral dorsolateral prefrontal cortex; Bi, bilateral (anodal + cathodal); B&B, Box & block teST; BBS, Berg Balance Scale; BBT, Box and Block Test; BI, Barthel In…
